# Supplementary material for: Anion-directed assembly of a rectangular supramolecular cage in the solid state with electron-deficient phenoxylated oxacalix[2]arene[2]triazine
Source: Royal Society of Chemistry journal article supplement (doi:10.1039/c2cc36465d), 2012-01-01
Supplement: c2cc36465d.pdf [file c2cc36465d.pdf]

# Anion-directed Assembly of a Rectangular Supramolecular Cage in the Solid State with Electron-deficient Phenoxyated Oxacalix[2]arene[2]triazine

De-Xian Wang,<sup>\*[a]</sup> Shi-Xin Fa,<sup>[a]</sup> Yang Liu,<sup>[b]</sup> Bao-Yong Hou,<sup>[a]</sup> and Mei-Xiang Wang<sup>\*[b]</sup>

<sup>a</sup>Beijing National Laboratory for Molecular Sciences, CAS Key Laboratory of Molecular Recognition and Function, Institute of Chemistry, Chinese Academy of Sciences, Beijing 100190, China. <sup>b</sup>The Key Laboratory of Bioorganic Phosphorous Chemistry & Chemical Biology (Ministry of Education), Department of Chemistry, Tsinghua University, Beijing 100084, China

[dxwang@iccas.ac.cn](mailto:dxwang@iccas.ac.cn)

## Table of Contents

|                                                                         |     |
|-------------------------------------------------------------------------|-----|
| 1. General information                                                  | S2  |
| 2. Experimental details and characterizations of products               | S2  |
| 3. Crystal structures                                                   | S4  |
| 4. Spectroscopic titration data                                         | S7  |
| 5. <sup>1</sup> H NMR titration data                                    | S14 |
| 6. ESI-MS spectrum                                                      | S21 |
| 7. Copies of <sup>1</sup> H and <sup>13</sup> C NMR spectra of products | S25 |

## 1. General Information

$^1\text{H}$  and  $^{13}\text{C}$  NMR spectra were recorded on 300, 400 or 600MHz NMR spectrometer. Chemical shifts are reported in ppm versus tetramethylsilane with either tetramethylsilane or the residual solvent resonance used as an internal standard. All solvents were dried according to standard procedures prior to use. All other major chemicals were obtained from commercial sources and used without further purification. The single crystal of **5a**, **5b** and the complex of  $[\mathbf{5a}\cdot\text{Et}_4\text{NCl}]$  were obtained by slow evaporation of a mixture of dichloromethane and hexane, acetone and hexane, dichloromethane and methanol, respectively.

## 2. Experimental details and characterization of products

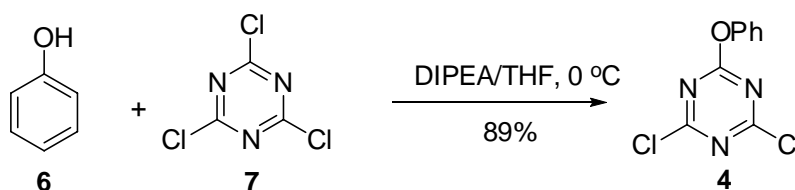

Scheme S1 Synthesis of **4**.

Preparation of **4**: To a solution of 2,4,6-trichloro-1,3,5-triazine **7** (5 mmol, 922 mg) in 15 mL THF, phenol **6** (5 mmol, 470 mg) in 20 mL THF and DIPEA (5.5 mmol, 709 mg) were added dropwise during 2 h. The mixture was stirring under icebath. After the reaction was finished, the resulting mixture was concentrated and was chromatographed on a silica gel (200-300 meshes) column eluting with a mixture of petroleum ether and acetone (6 : 1). Pure **4** was obtained as a white solid (1.08 g, 89%):  $^1\text{H}$  NMR (400MHz,  $\text{CDCl}_3$ )  $\delta$ 7.49-7.43 (2H, m), 7.37-7.31(1H, m), 7.20-7.15(2H, m);  $^{13}\text{C}$  NMR (100MHz,  $\text{CDCl}_3$ )  $\delta$ 173.2, 171.2, 151.1, 130.0, 127.1, 121.1.

Preparation of **5a**. Mixing **4** (2 mmol, 484 mg), **3** (2 mmol, 220 mg) and anhydrous  $\text{K}_2\text{CO}_3$  (50 mL) in 20 mL acetonitrile. The mixture was refluxed for 24 h. After filtration and concentration, the residue was chromatographed on a silica gel (200-300

meshes) column eluting with a mixture of petroleum ether and ethyl acetate. Pure product **5a** (219 mg, 39%) was obtained as white solids: mp 176-178 °C; <sup>1</sup>H NMR (CDCl<sub>3</sub>, 400 MHz) δ 7.54-7.46 (m, 4H), 7.38-7.24 (m, 8H), 7.02-6.98 (2H, d, *J* = 1.8 Hz), 6.98-6.92 (4H, dd, *J*<sub>1</sub> = 8.3 Hz, *J*<sub>2</sub> = 1.8 Hz); <sup>13</sup>C NMR (CDCl<sub>3</sub>, 100 MHz) δ 174.6, 173.7, 152.3, 152.1, 130.5, 129.7, 126.2, 121.7, 119.0, 116.6; IR (KBr) ν 1566, 1483, 1367, 1199 cm<sup>-1</sup>; MS (MALDI-TOF) *m/z* 559.2 (M+H<sup>+</sup>), 581.2 (M+Na<sup>+</sup>). Anal. Calcd. for C<sub>30</sub>H<sub>18</sub>N<sub>6</sub>O<sub>6</sub>: C, 64.52; H, 3.25; N, 15.05. Found: C, 64.82; H, 3.40; N, 14.93.

Preparation of cage molecule **5b**. Mixing **2** (1 mmol, 184 mg) and anhydrous K<sub>2</sub>CO<sub>3</sub> (2.2 mmol, 304 mg) in 20 mL dried acetonitrile. After stirring at room temperature for 30 min, a solution **1** (0.5 mmol, 222 mg) in 20 mL dried acetonitrile was added dropwise. The mixture was then stirred for another 30 min. After filtration and concentration, the residue was chromatographed on a silica gel (200-300 meshes) column eluting with a mixture of petroleum ether, ethyl acetate and dichloromethane (12 : 1 : 1). Pure **5b** (353 mg, 96%) was then obtained as white solids : mp 269-270 °C; <sup>1</sup>H NMR (CDCl<sub>3</sub>, 300 MHz) δ 7.29 (2H, t, *J*<sub>1</sub> = 8.10 Hz), 6.89 (4H, dd, *J*<sub>1</sub> = 8.10 Hz, *J*<sub>2</sub> = 2.10 Hz), 6.74 (2H, t, *J*<sub>2</sub> = 2.10 Hz); <sup>13</sup>C NMR (CDCl<sub>3</sub>, 75 MHz) δ 174.0, 173.1, 151.9, 141.4 (dm, *J*<sub>1</sub> = 254.3 Hz, *J*<sub>2</sub> = 13.6 Hz), 140.1 (dm, *J*<sub>1</sub> = 254.3 Hz, *J*<sub>2</sub> = 13.6 Hz), 138.1 (dm, *J*<sub>1</sub> = 254.3 Hz, *J*<sub>2</sub> = 13.6 Hz), 130.7, 126.1 (t, *J*<sub>2</sub> = 13.6 Hz), 119.6, 116.2; IR (KBr) ν 1589, 1521, 1485, 1449 cm<sup>-1</sup>; MS (MALDI-TOF) *m/z* 739.2 (M+H<sup>+</sup>). Anal. Calcd. for C<sub>30</sub>H<sub>8</sub>F<sub>10</sub>N<sub>6</sub>O<sub>6</sub>: C, 48.80; H, 1.09; N, 11.38. Found: C, 48.67; H, 1.31; N, 11.26.

### 3. Crystal structure

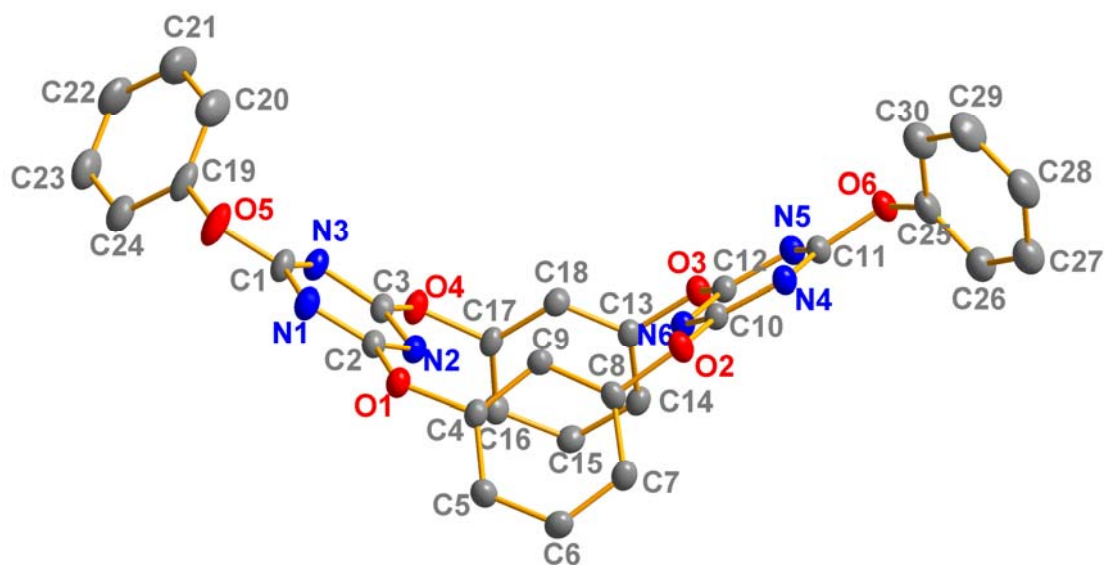

**Figure S1** Crystal structure of **5a**. Selected bond length [Å]: C4-O1 1.414, O1-C2 1.337, C8-O2 1.420, O2-C10 1.340, C12-O3 1.339, O3-C13 1.408, C17-O4 1.417, O4-C3 1.337. Selected distances [Å]: C1 $\cdots$ C11 9.082, N2 $\cdots$ N6 4.574, C18 $\cdots$ C9 4.295, C15 $\cdots$ C6 6.233.

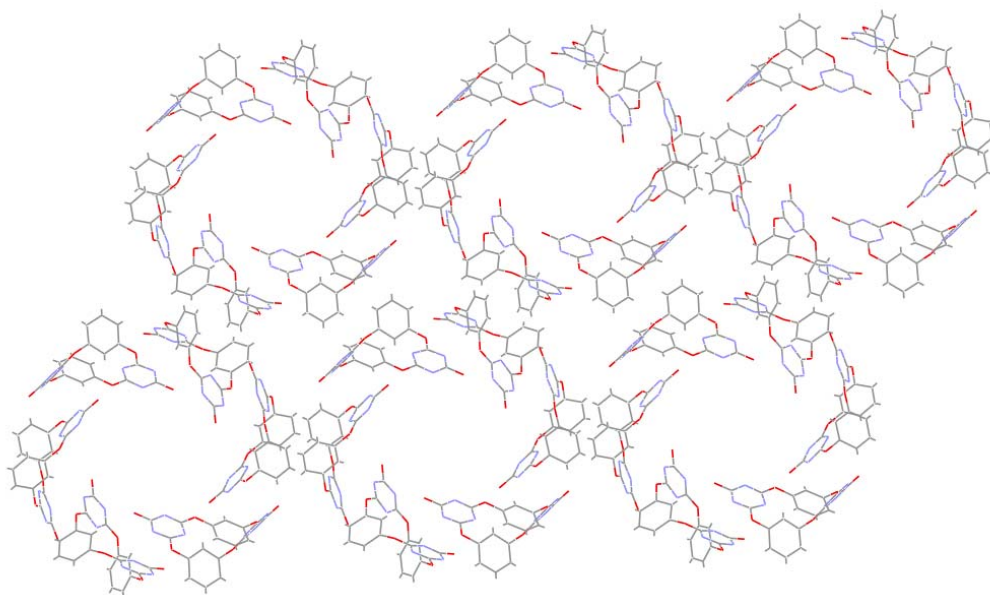

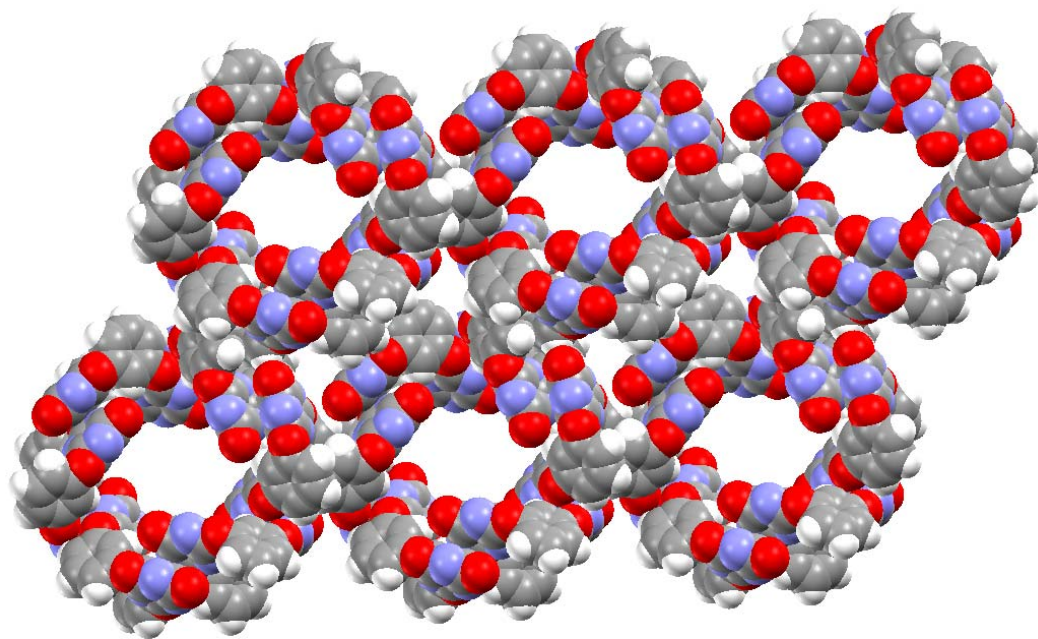

**Figure S2** Self assembly of **5a**.

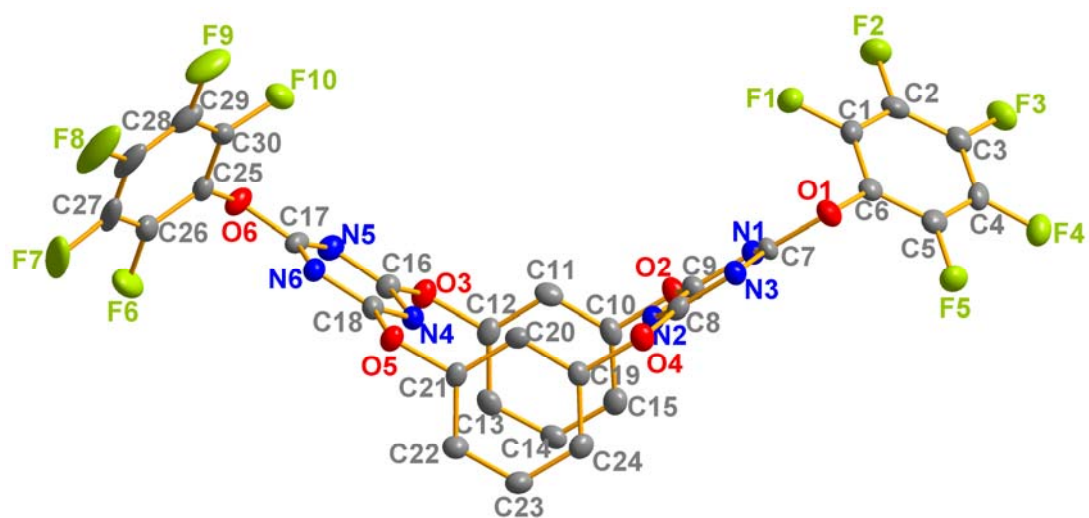

**Figure S3** Crystal structure of **5b**. Selected bond length [Å]: C9-O2 1.326, O2-C10 1.431, C12-O3 1.420, O3-C16 1.330, C18-O5 1.351, O5-C21 1.412, C19-O4 1.420, O4-C8 1.341. Selected distances [Å]: C7 $\cdots$ C17 9.027, N4 $\cdots$ N2 4.600, C20 $\cdots$ C11 4.435, C23 $\cdots$ C14 4.925.

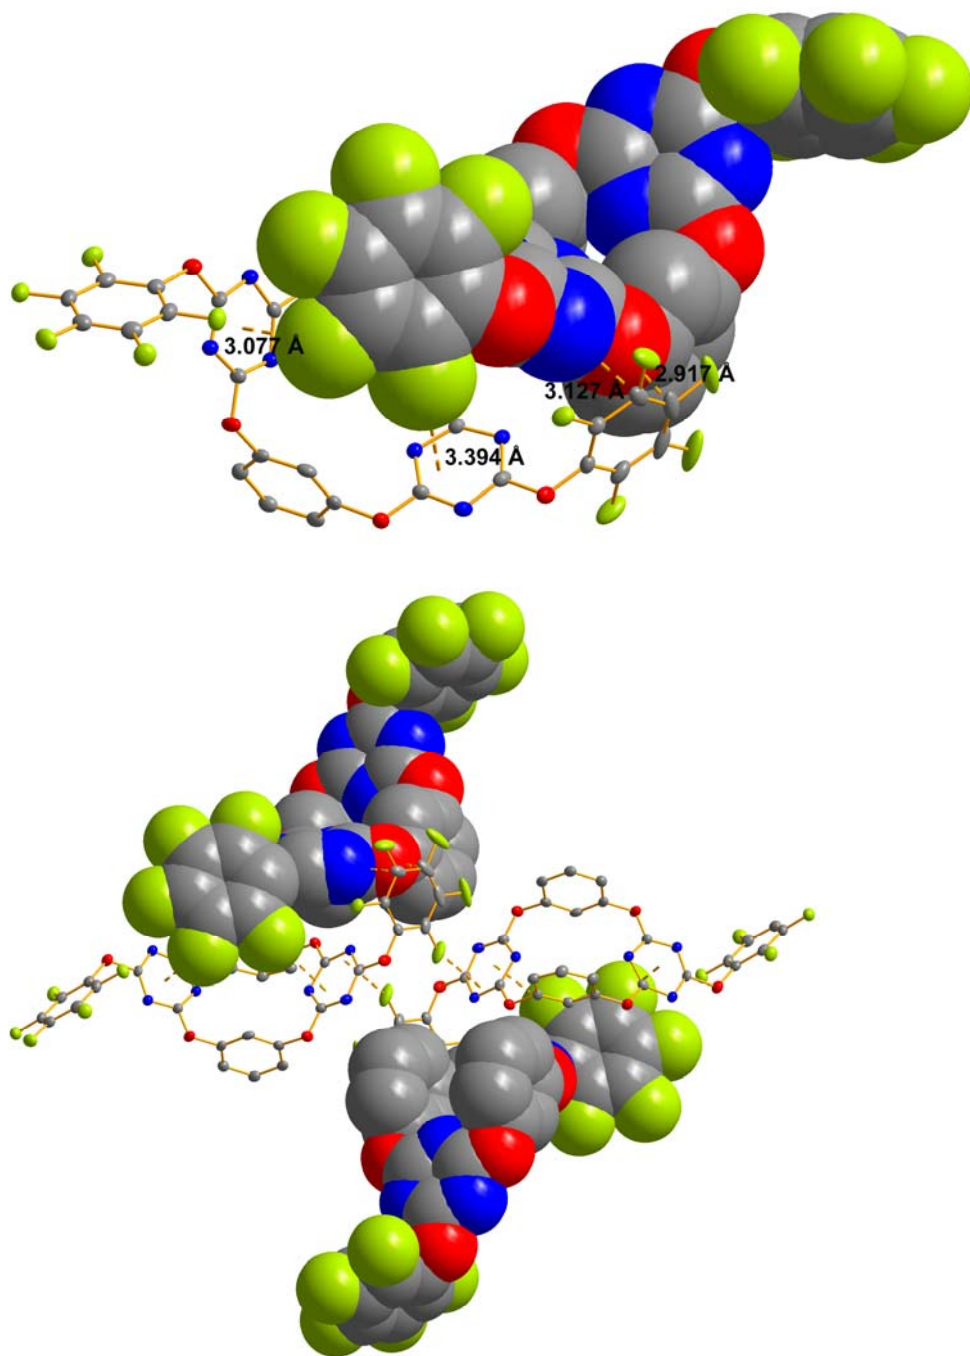

**Figure S4** Self assembly of **5b** through multiple lone pair electrons- $\pi$  interactions.

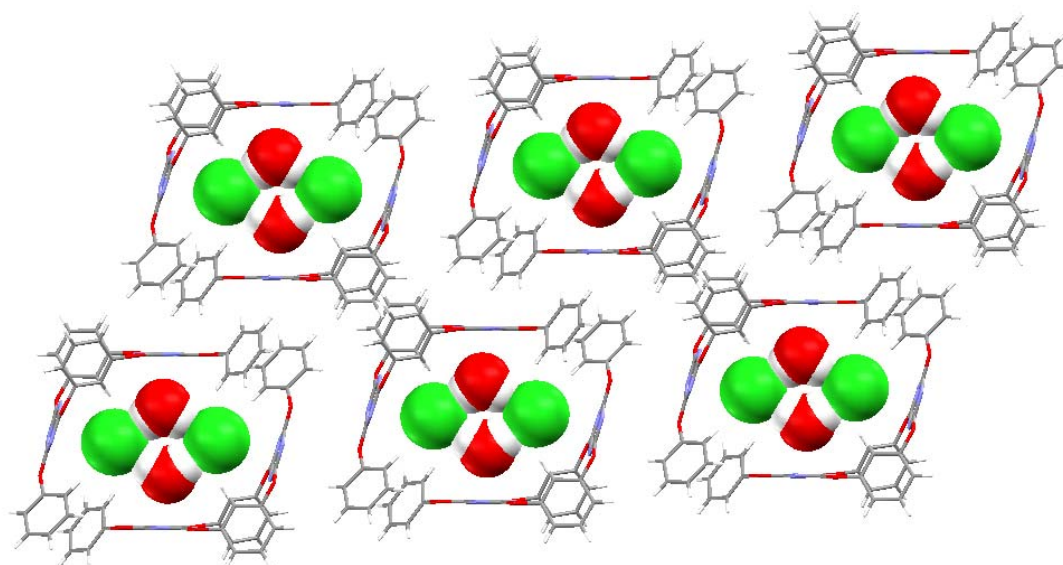

**Figure S5** Self assembled cage structure of  $[5a \cdot Cl \cdot H_2O]$  complex through multiple weak interactions.

#### 4. Spectroscopic titration data

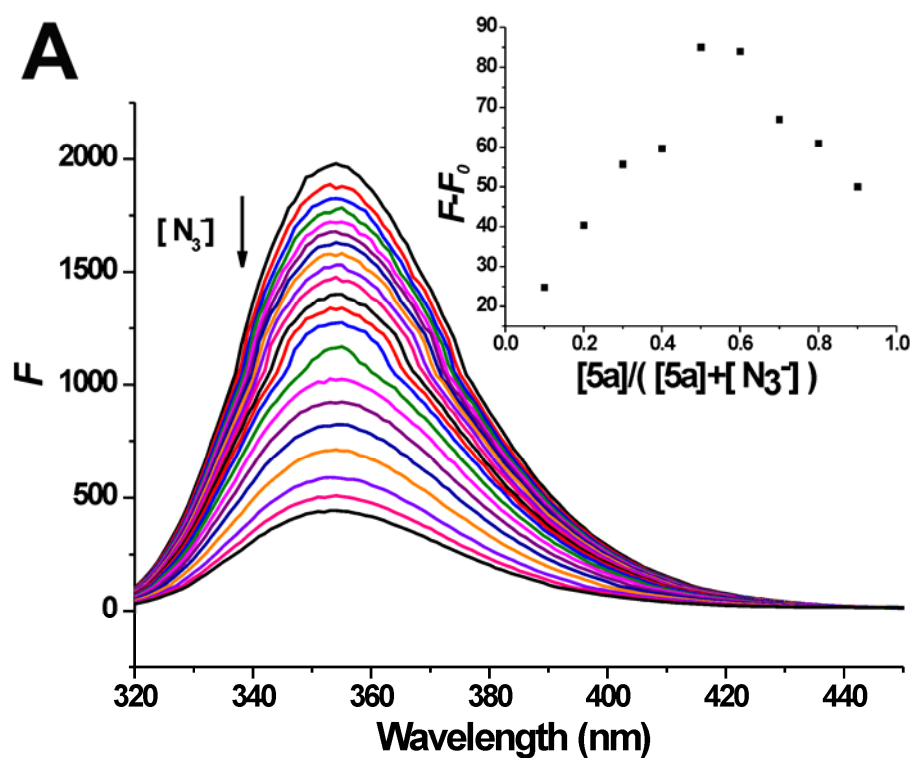

**Figure S6** Fluorescence titration curves of **5a** ( $5.68 \times 10^{-4}$  M in 2.0 mL acetonitrile) upon the addition of tetrabutylammonium azide (0, 1.11, 2.23, 3.37, 4.45, 5.569, 6.67, 7.79, 8.90, 10.0, 11.1, 13.4, 15.6, 16.7, 17.8, 18.9, 20.0, 21.1, 22.3  $\times 10^{-4}$  M), respectively. The excitation wavelength was 298 nm. Insert is the Job's plot of the complex.

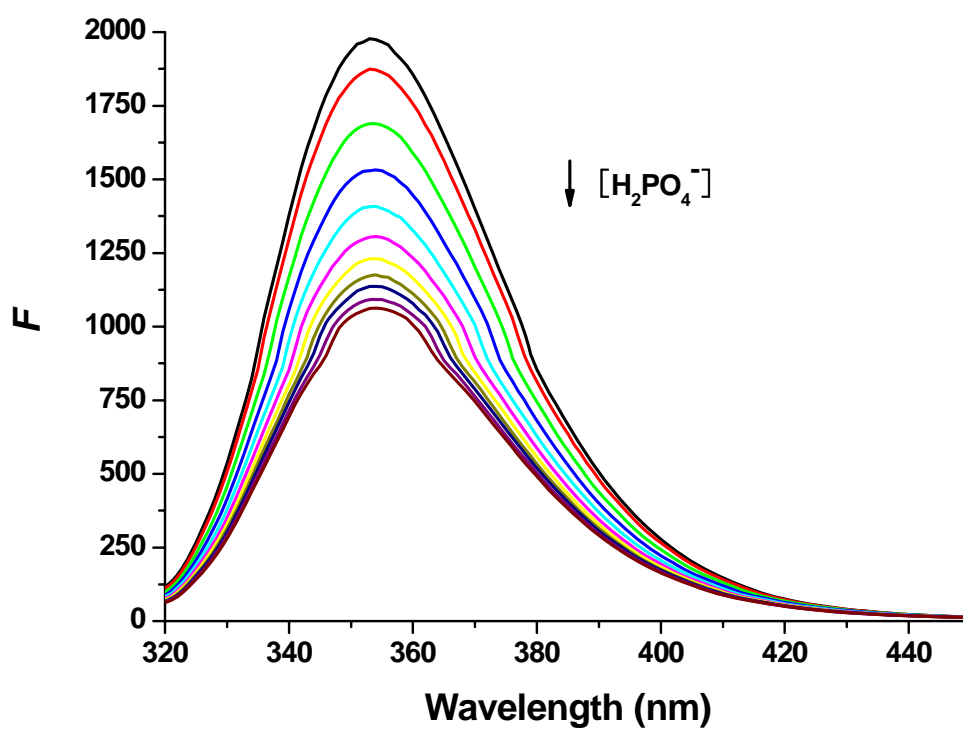

**Figure S7** Fluorescence titration curves of **5a** ( $5.68 \times 10^{-4}$  M in 2.0 mL acetonitrile) upon the addition of tetrabutylammonium phosphate (0, 0.18, 0.36, 0.54, 0.715, 0.89, 1.07, 1.25, 1.43, 1.61,  $1.79 \times 10^{-4}$  M), respectively. The excitation wavelength was 298 nm. The excitation and emission band widths were both 10 nm and the scan speed was set at 240 nm/min, respectively.



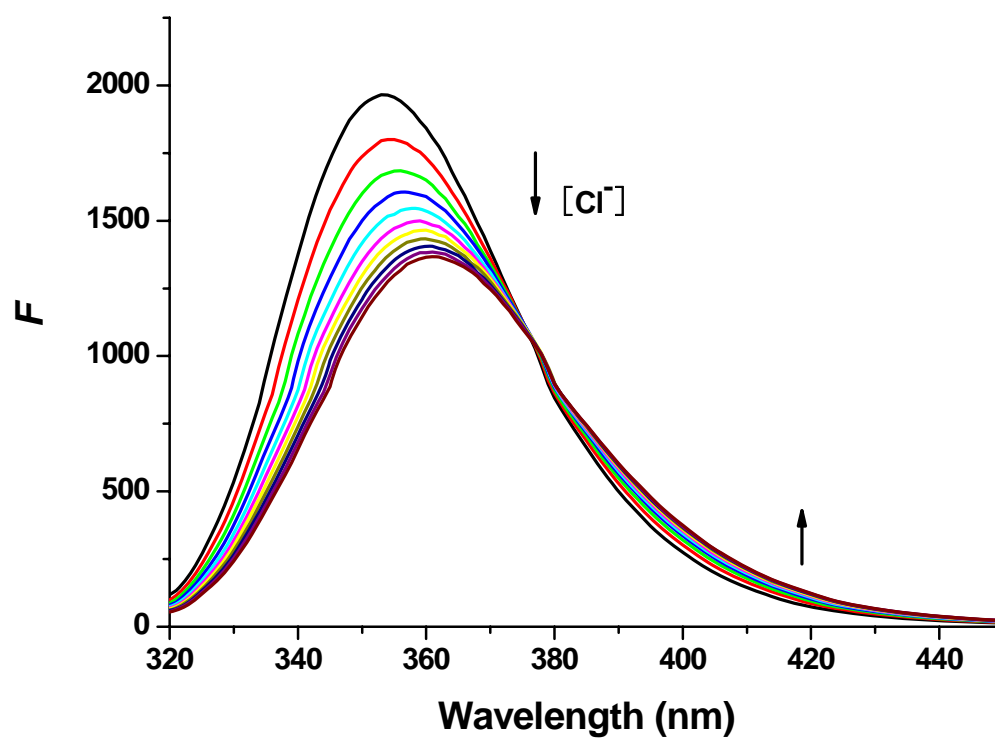

**Figure S8** Fluorescence titration curves of **5a** ( $5.68 \times 10^{-4}$  M in 2.0mL acetonitrile) upon the addition of tetrabutylammonium chloride (0, 0.37, 0.74, 1.11, 1.48, 1.85, 2.23, 2.60, 2.97, 3.34,  $3.71 \times 10^{-3}$  M), respectively. The excitation wavelength was 298 nm. The excitation and emission band widths were both 10 nm and the scan speed was set at 240 nm/min, respectively.

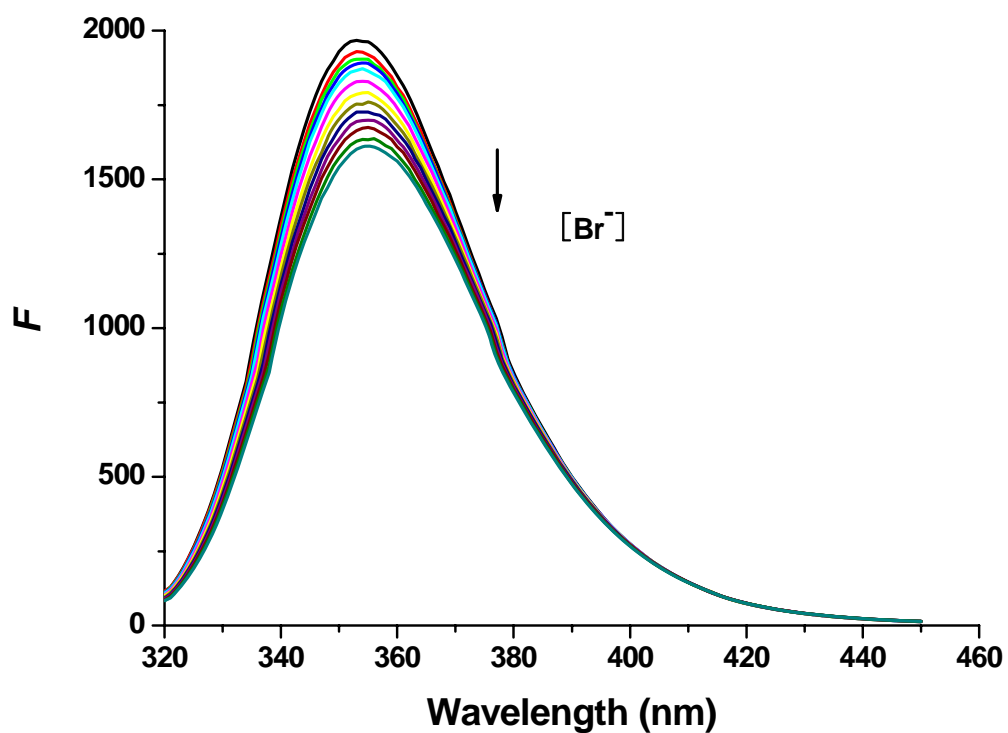

**Figure S9** Fluorescence titration curves of **5a** ( $5.68 \times 10^{-4}$  M in 2.0mL acetonitrile) upon the addition of tetrabutyl ammonium bromide (0, 0.18, 0.35, 0.527, 0.70, 1.05, 1.41, 1.78, 2.11, 2.46, 2.81, 3.16,  $3.51 \times 10^{-3}$  M), respectively. The excitation wavelength was 298 nm. The excitation and emission band widths were both 10 nm and the scan speed was set at 240nm/min, respectively.

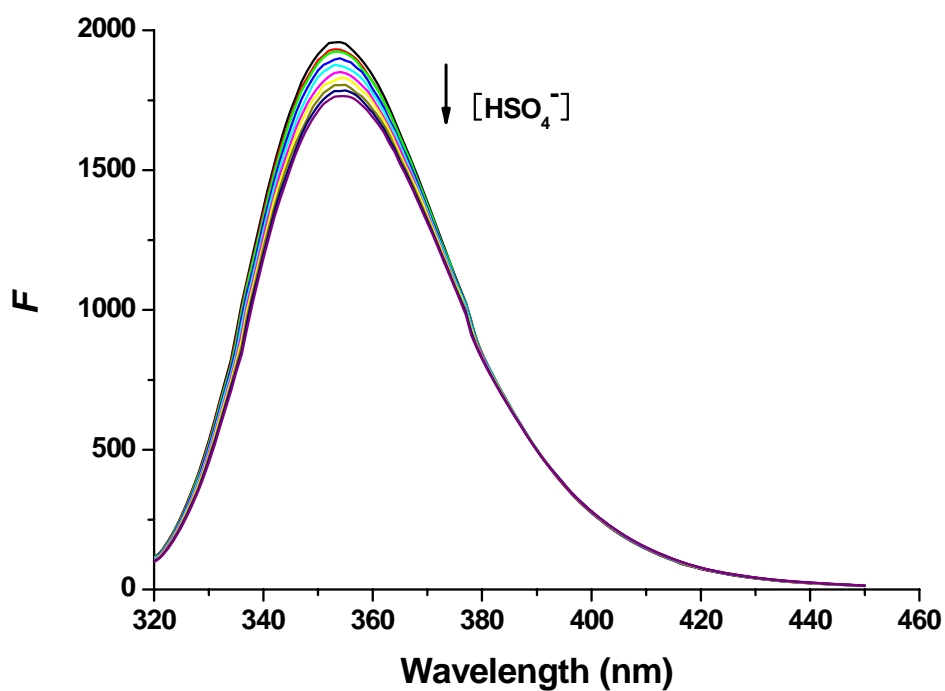

**Figure S10** Fluorescence titration curves of **5a** ( $5.68 \times 10^{-4}$  M in 2.0mL acetonitrile) upon the addition of tetrabutyl ammonium sulfate (0, 0.19, 0.38, 0.76, 1.14, 1.52, 1.91, 2.285, 2.67,  $3.05 \times 10^{-3}$  M), respectively. The excitation wavelength was 298 nm. The excitation and emission band widths were both 10 nm and the scan speed was set at 240nm/min, respectively.

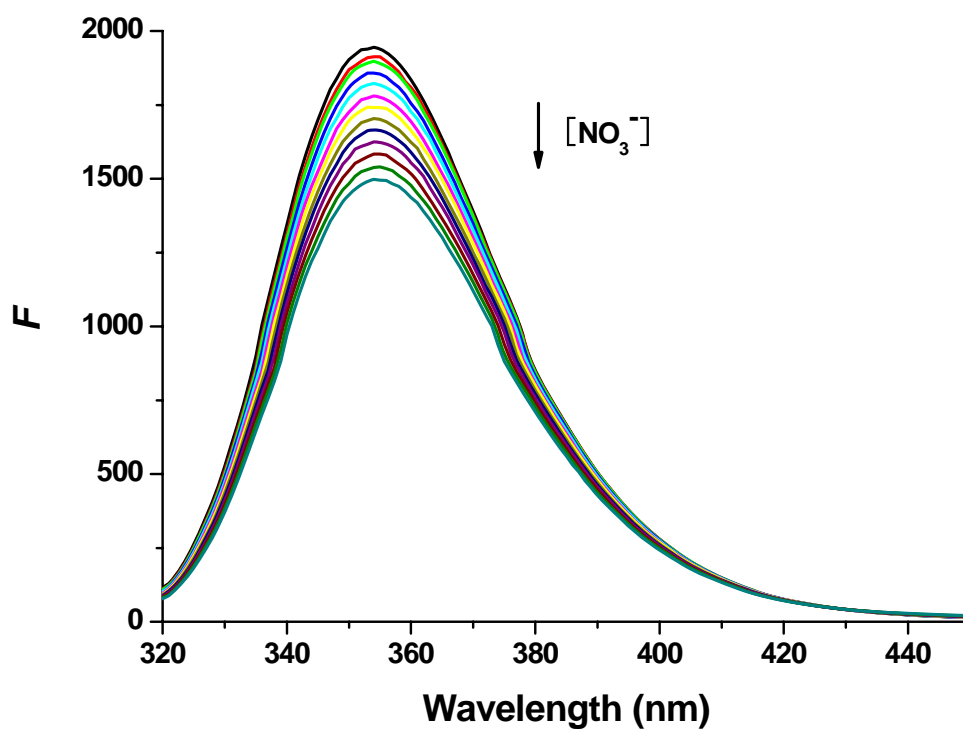

**Figure S11** Fluorescence titration curves of **5a** ( $5.68 \times 10^{-4}$  M in 2.0mL acetonitrile) upon the addition of tetrabutyl ammonium nitrate (0, 0.35, 0.70, 1.05, 1.40, 1.75, 2.11, 2.456, 2.81, 3.16, 3.51, 3.86,  $4.21 \times 10^{-3}$  M), respectively. The excitation wavelength was 298 nm. The excitation and emission band widths were both 10 nm and the scan speed was set at 240nm/min, respectively.

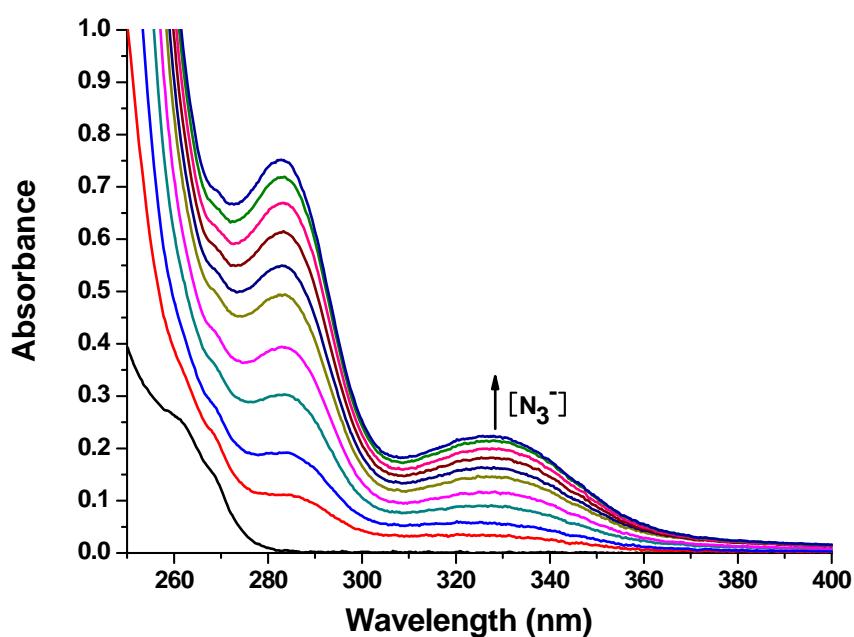

**Figure S12** UV-vis titration curves of **5b** ( $1.76 \times 10^{-4}$  M in 1 mL acetonitrile) upon the addition of tetrabutylammonium azide (0, 0.39, 0.78, 1.17, 1.560, 1.95, 2.34, 2.73, 3.12, 3.51,  $3.90 \times 10^{-4}$  M), respectively.

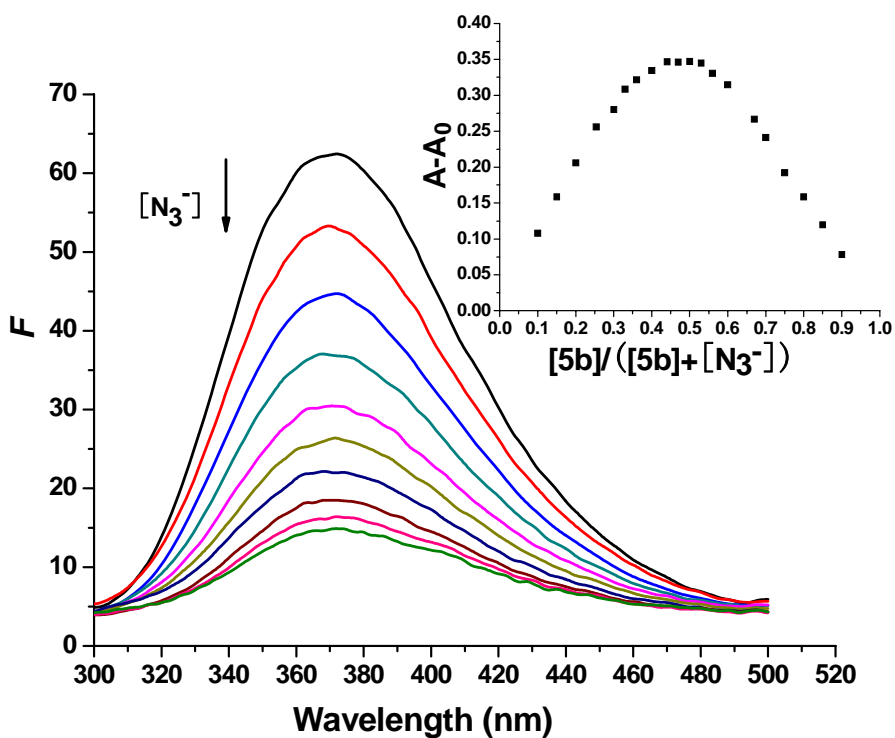

**Figure S13** Fluorescence titration curves of **5b** ( $1.73 \times 10^{-4}$  M in 1.0mL acetonitrile) upon the addition of tetrabutylammonium azide (0, 0.39, 0.78, 1.17, 1.56, 1.95, 2.34, 2.73, 3.12, 3.51,  $3.90 \times 10^{-4}$  M), respectively. The excitation wavelength was 259 nm. The excitation and emission band widths were both 10 nm and the scan speed was set at 240nm/min, respectively. The insert is the Job plot of the complex and total concentration is  $7.10 \times 10^{-4}$  M.

### 5. $^1\text{H}$ NMR titration data

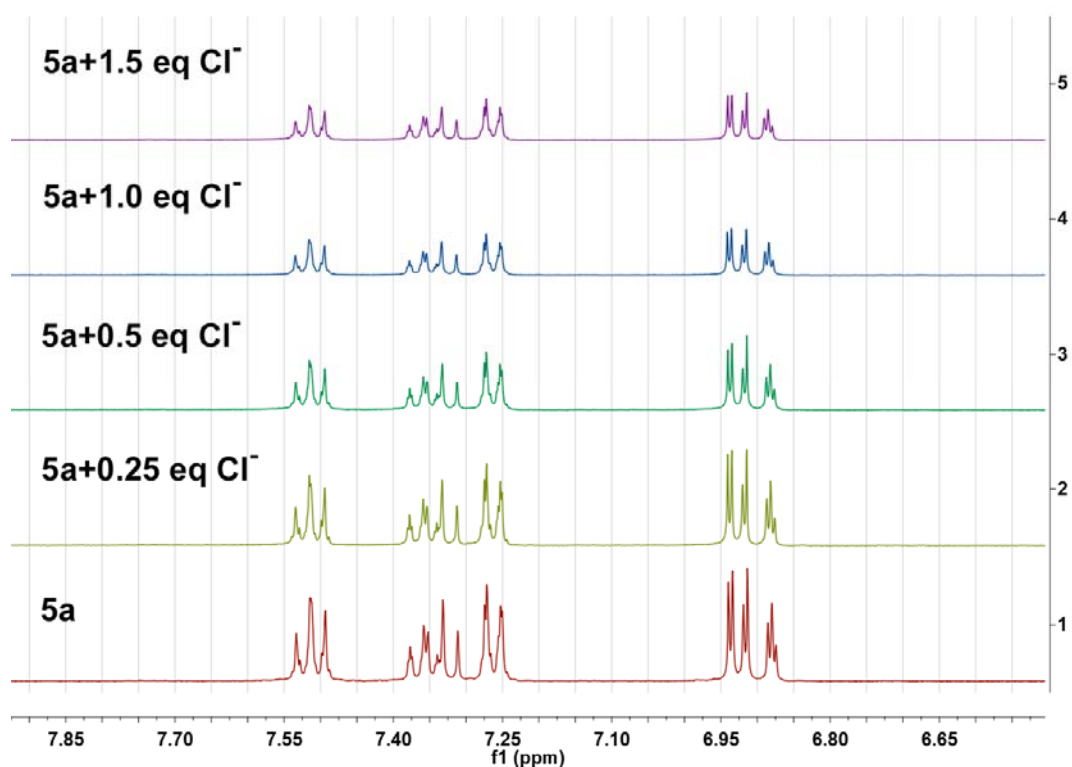

**Figure S14**  $^1\text{H}$  titration of **5a** upon the addition of chloride (in  $\text{CD}_3\text{CN}$  and with 400 MHz NMR spectrometer).

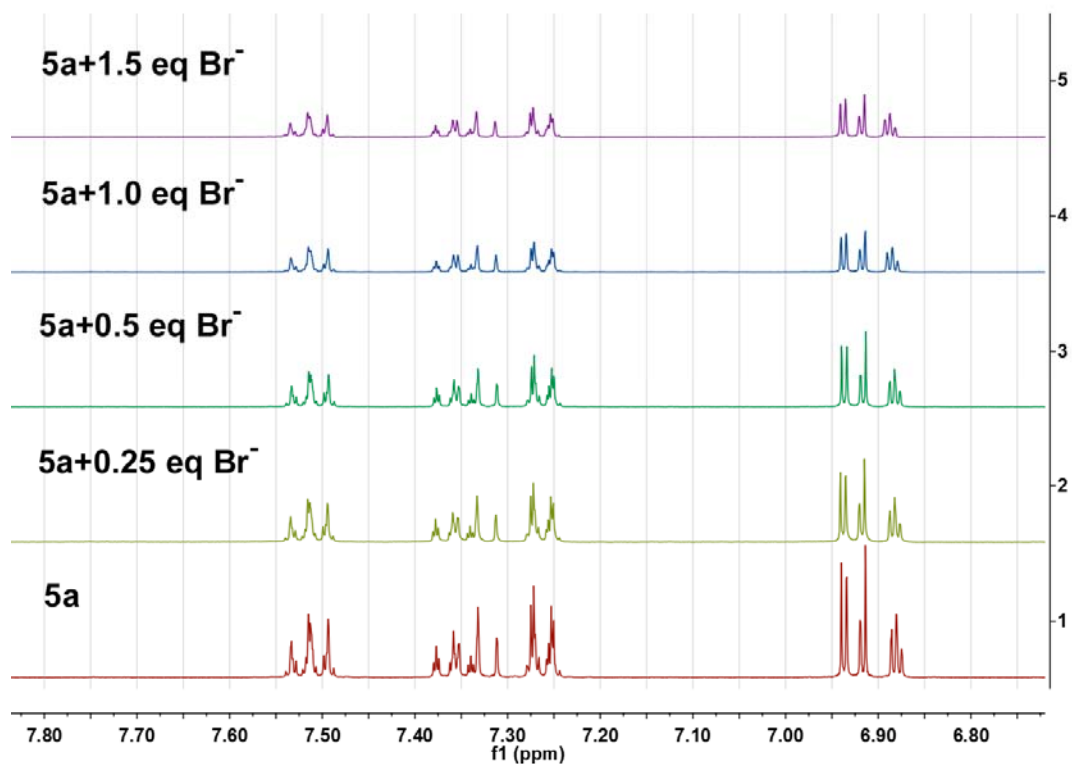

**Figure S15** <sup>1</sup>H titration of **5a** upon the addition of bromide (in CD<sub>3</sub>CN and with 400 MHz NMR spectrometer).

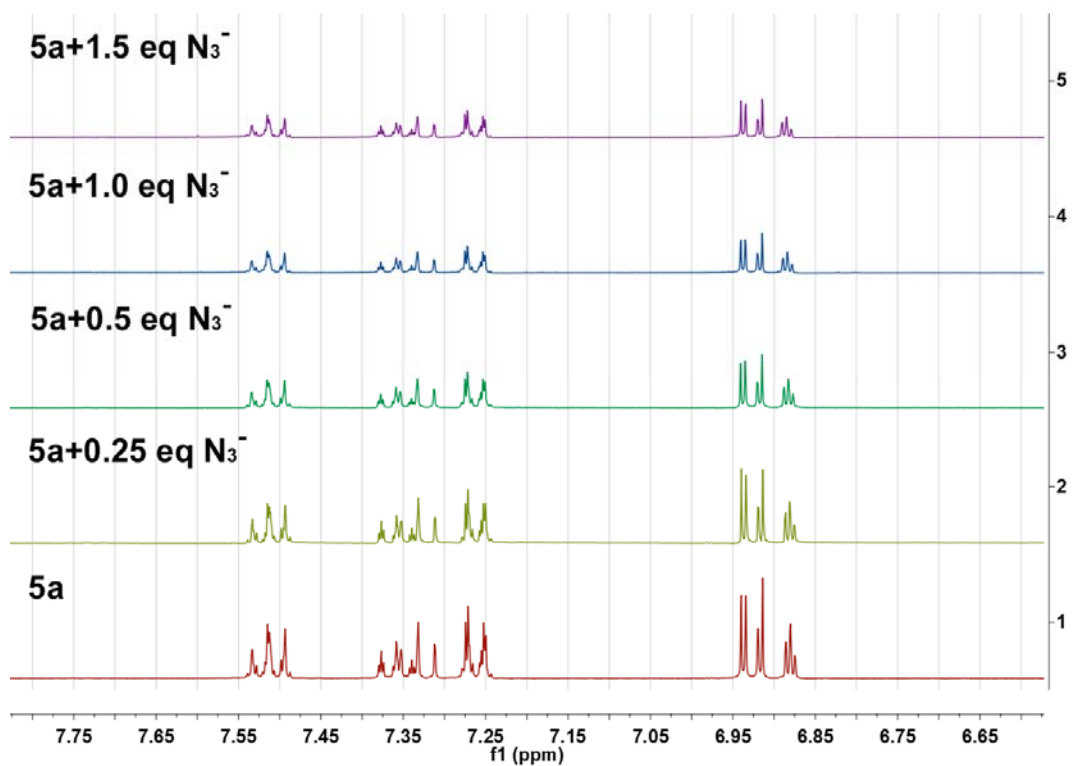

**Figure S16** <sup>1</sup>H titration of **5a** upon the addition of azide (in CD<sub>3</sub>CN and with 400 MHz NMR spectrometer).

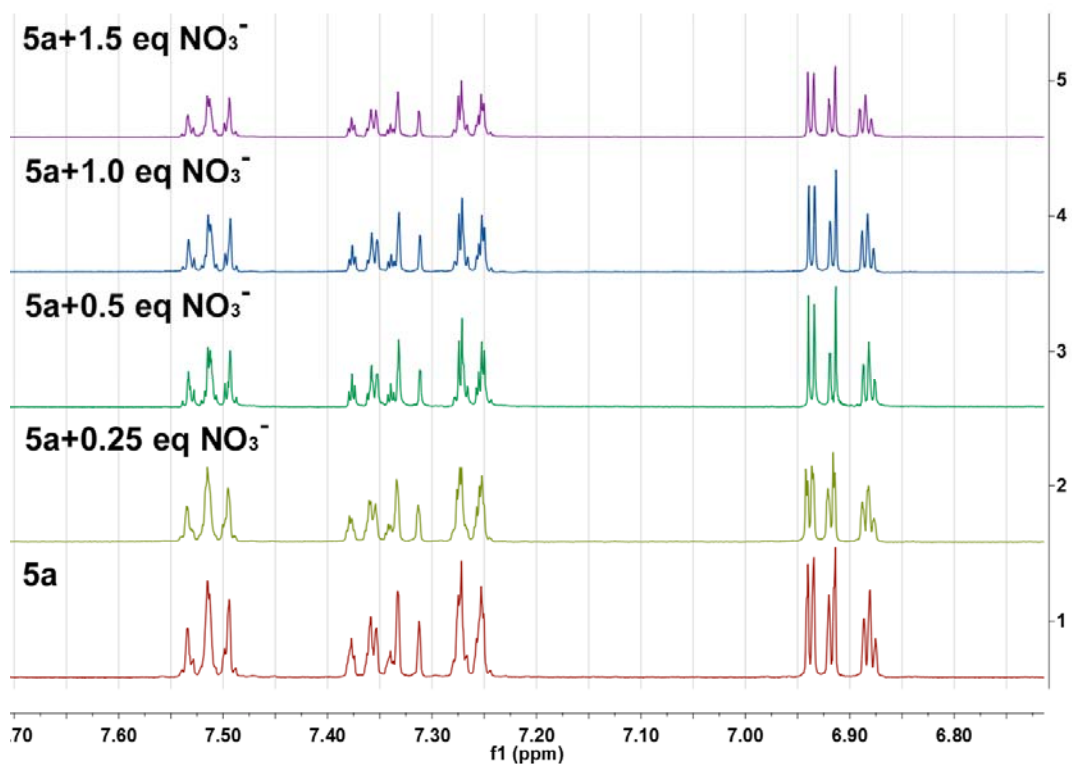

**Figure S17**  $^1\text{H}$  titration of **5a** upon the addition of nitrate (in  $\text{CD}_3\text{CN}$  and with 400 MHz NMR spectrometer).

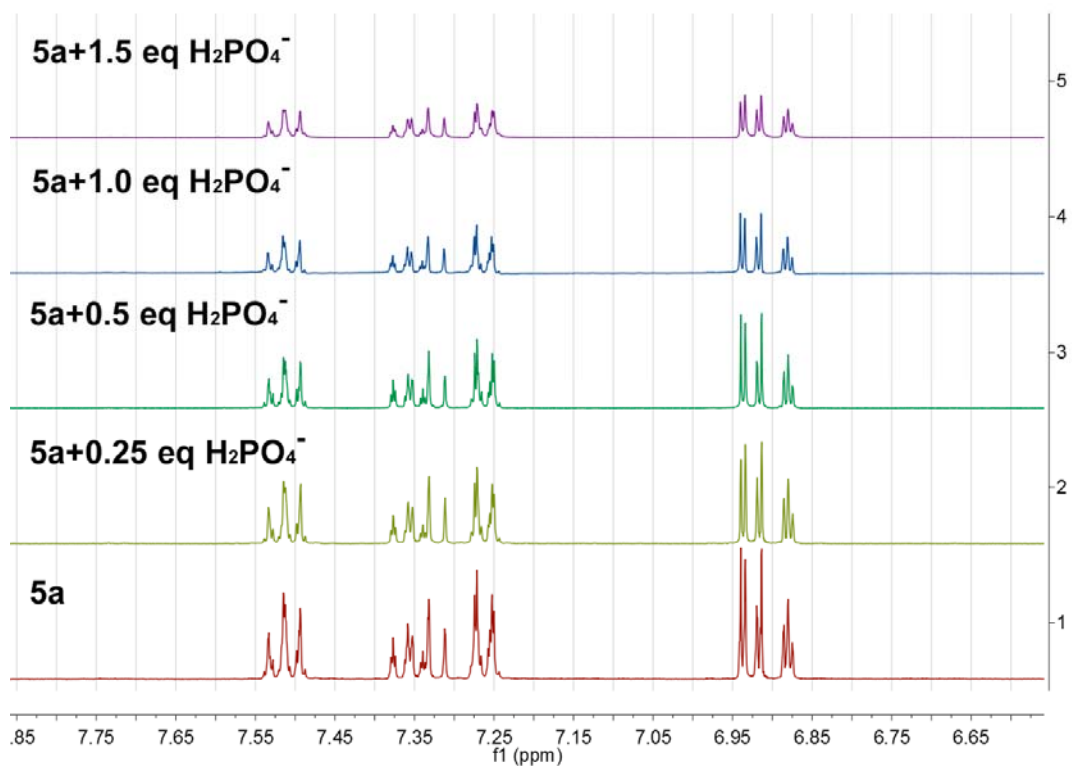

**Figure S18**  $^1\text{H}$  titration of **5a** upon the addition of phosphate (in  $\text{CD}_3\text{CN}$  and with 400 MHz NMR spectrometer).



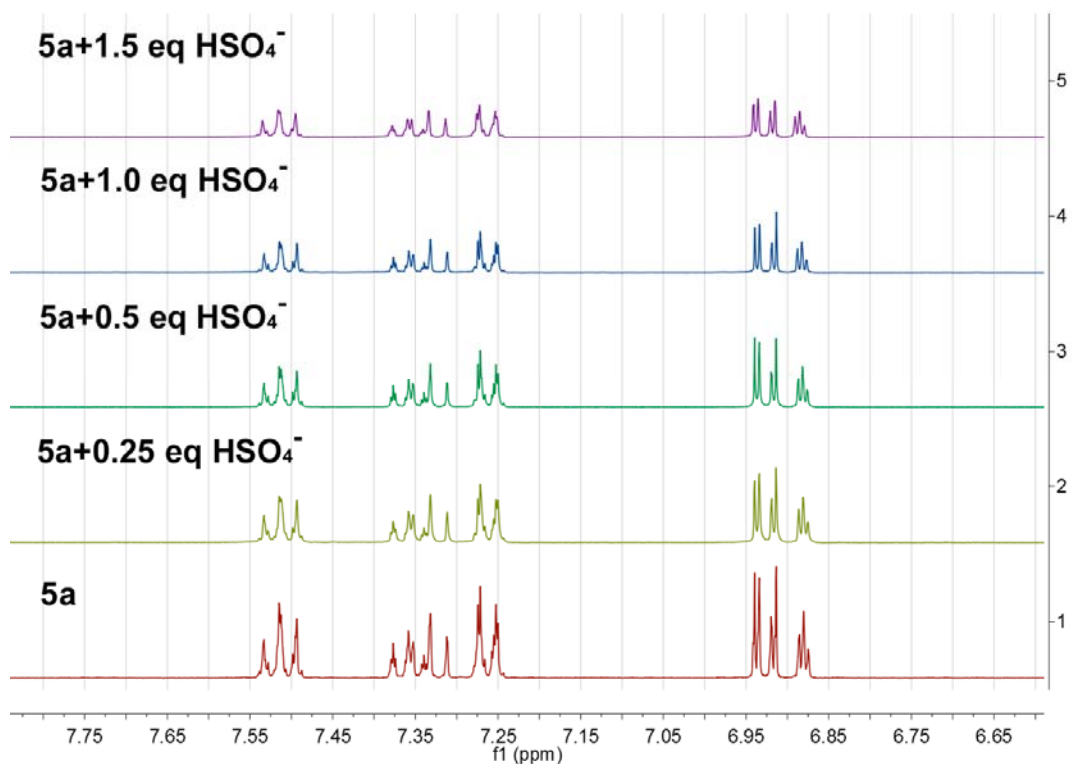

**Figure S19** <sup>1</sup>H titration of **5a** upon the addition of sulphate (in CD<sub>3</sub>CN and with 400 MHz NMR spectrometer).

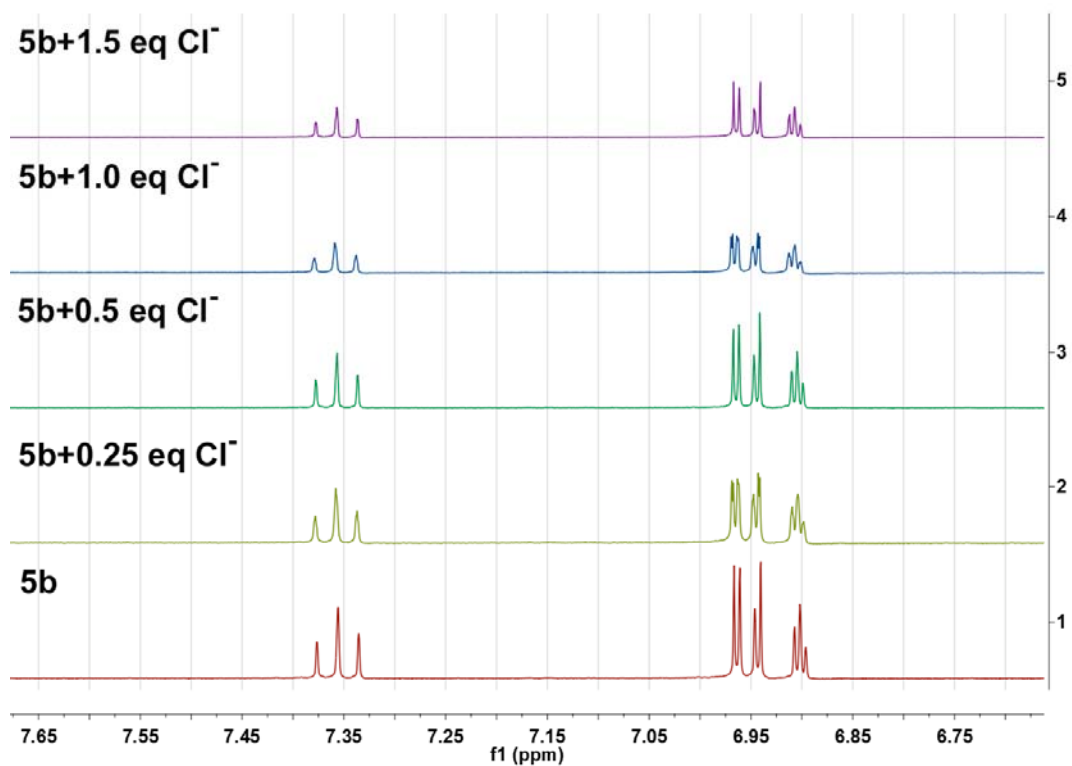

**Figure S20** <sup>1</sup>H titration of **5b** upon the addition of chloride (in CD<sub>3</sub>CN and with 400 MHz NMR spectrometer).

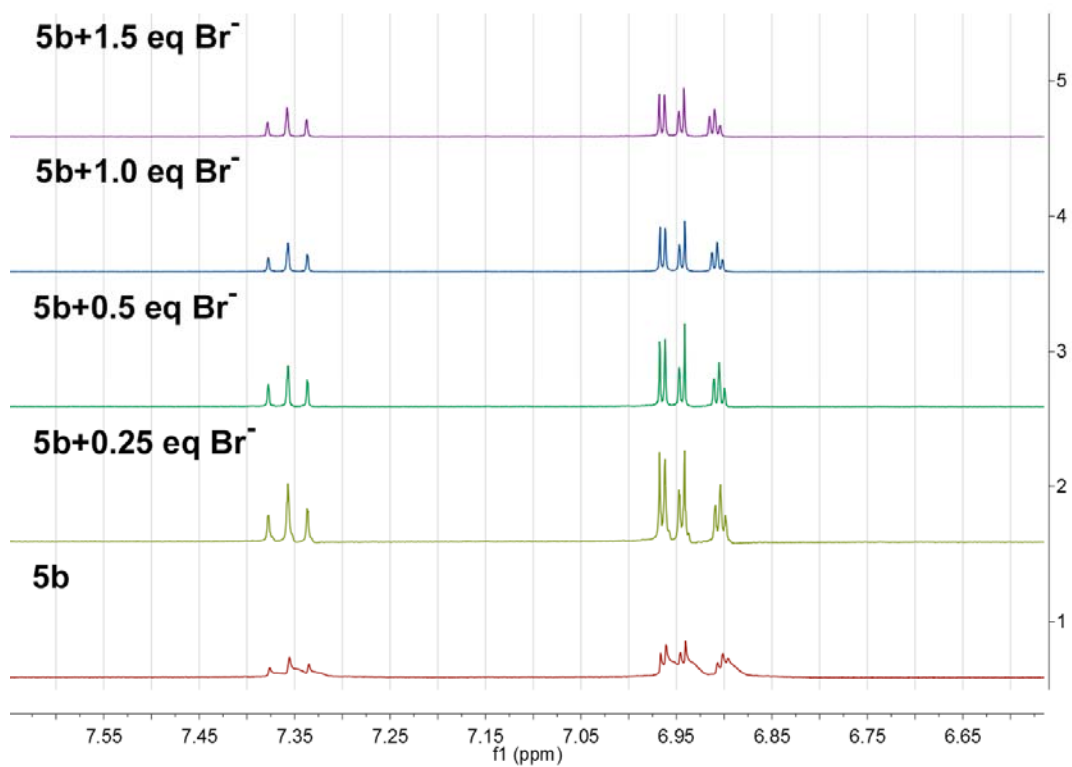

**Figure S21** <sup>1</sup>H titration of **5b** upon the addition of bromide (in CD<sub>3</sub>CN and with 400 MHz NMR spectrometer).

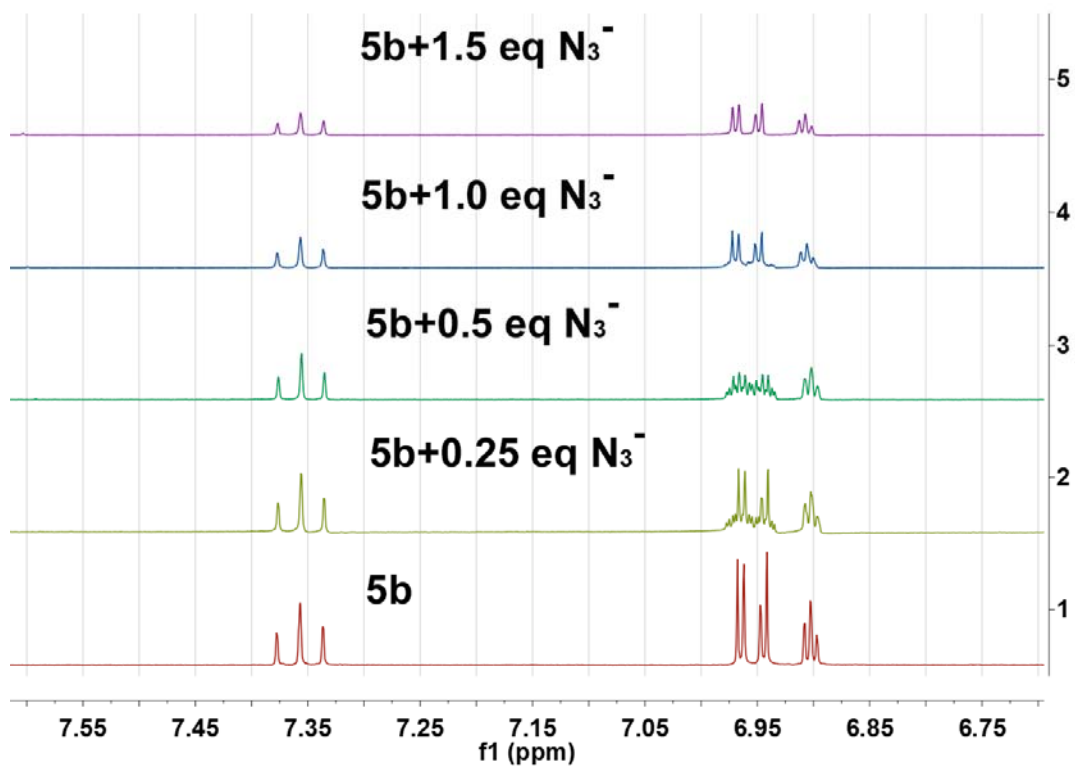

**Figure S22** <sup>1</sup>H titration of **5b** upon the addition of azide (in CD<sub>3</sub>CN and with 400 MHz NMR spectrometer).

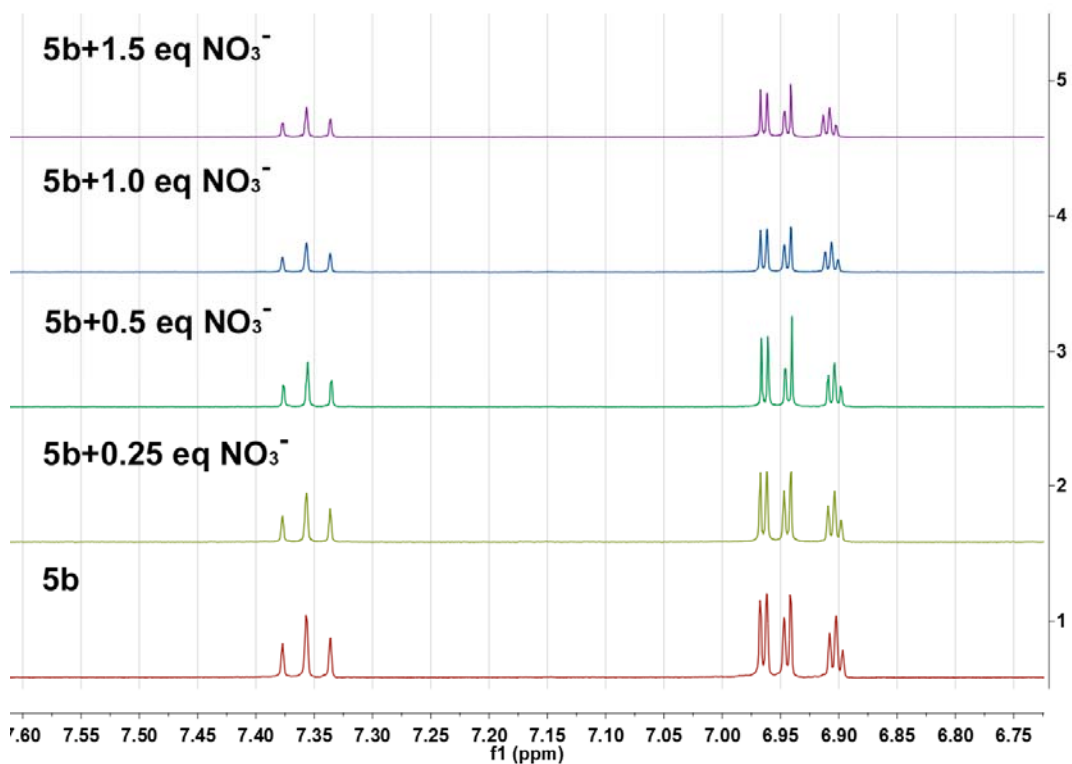

**Figure S23**  $^1\text{H}$  titration of **5b** upon the addition of nitrate (in  $\text{CD}_3\text{CN}$  and with 400 MHz NMR spectrometer).

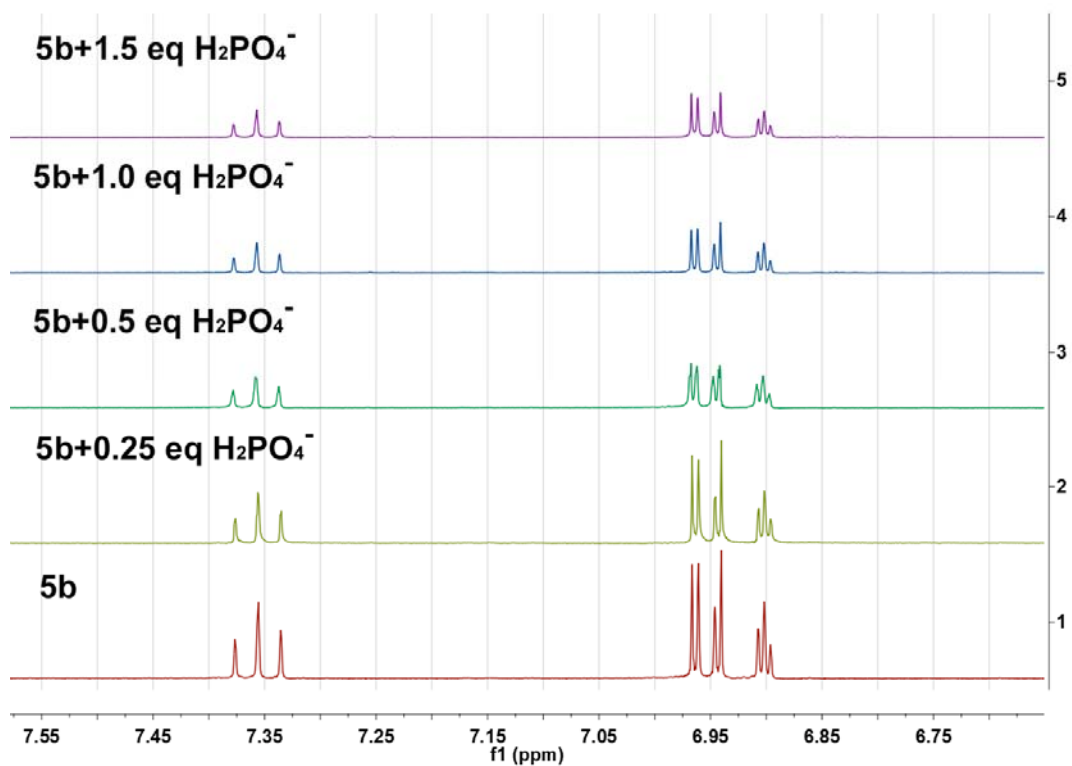

**Figure S24**  $^1\text{H}$  titration of **5b** upon the addition of phosphate (in  $\text{CD}_3\text{CN}$  and with 400 MHz NMR spectrometer).

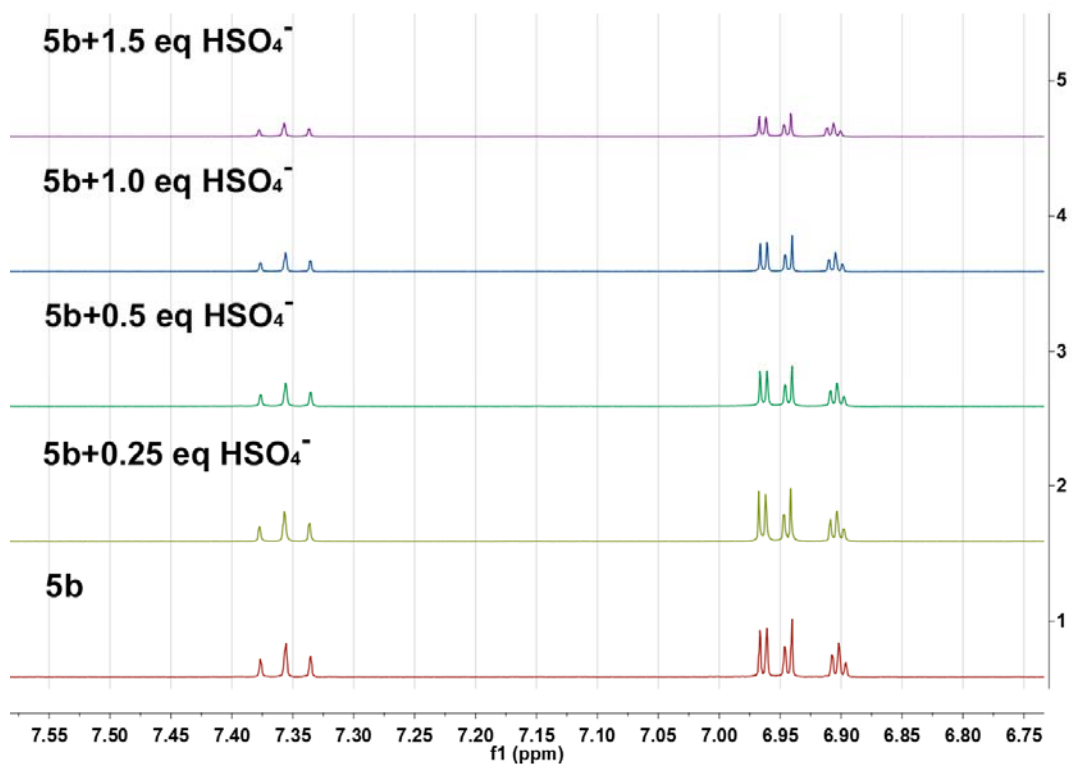

**Figure S25**  $^1\text{H}$  titration of **5b** upon the addition of sulphate (in  $\text{CD}_3\text{CN}$  and with 400 MHz NMR spectrometer).

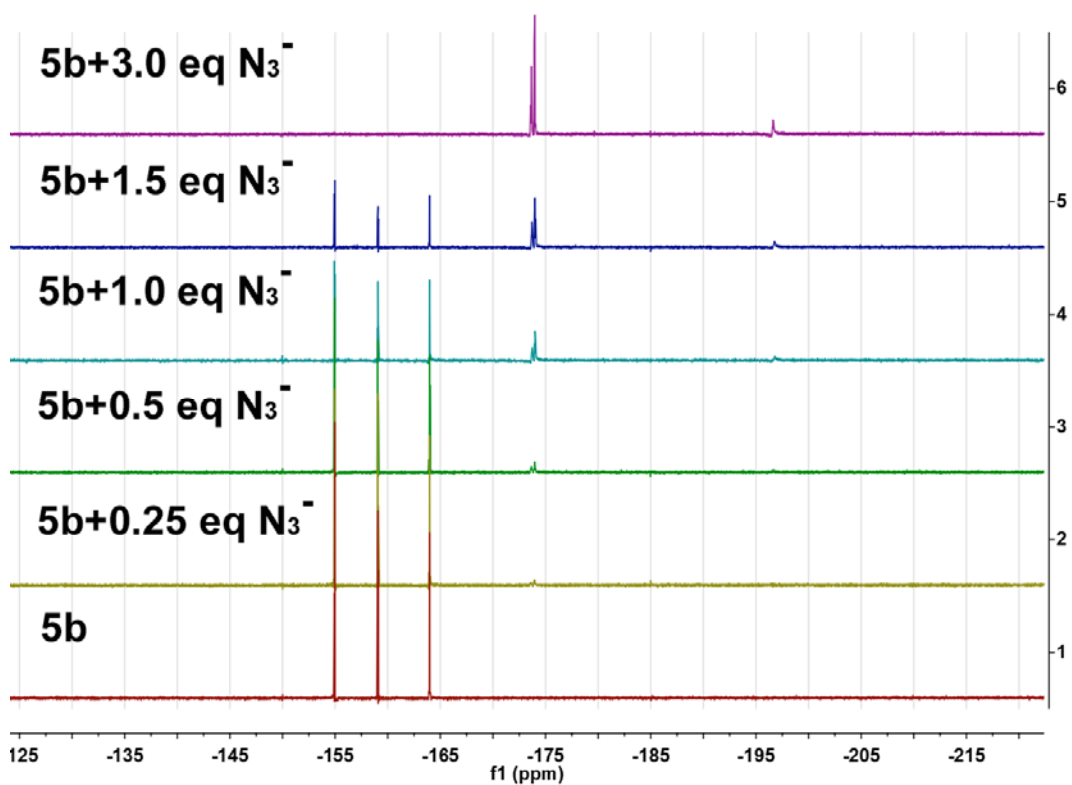

**Figure S26**  $^{19}\text{F}$  titration of **5b** upon the addition of azide (in  $\text{CD}_3\text{CN}$  and with 400 MHz NMR spectrometer).

## 6. ESI-MS spectrum

sx-cl\_111128142415 #12-21 RT: 0.19-0.35 AV: 10 NL: 2.54E4  
T: {0,0} - c ESI corona sid=50.00 det=1188.00 Full ms [ 100.00-1000.00]

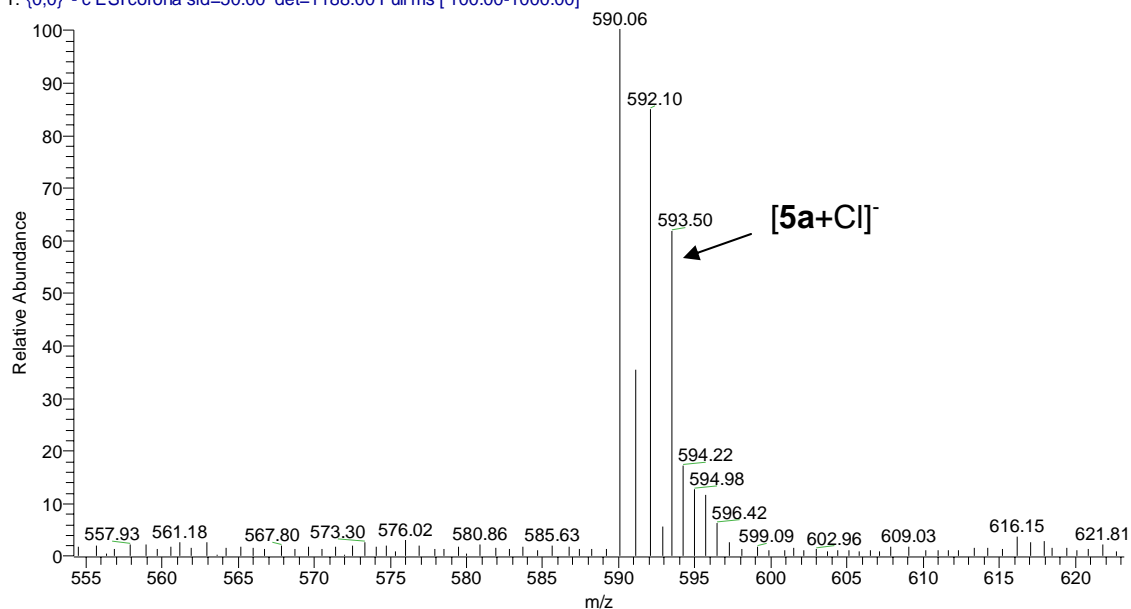

**Figure S27** ESI-MS spectrum of **5a** and chloride.

sx-br\_111128143015 #9-23 RT: 0.14-0.38 AV: 15 NL: 2.43E3  
T: {0,0} - c ESI corona sid=50.00 det=1188.00 Full ms [ 100.00-1000.00]

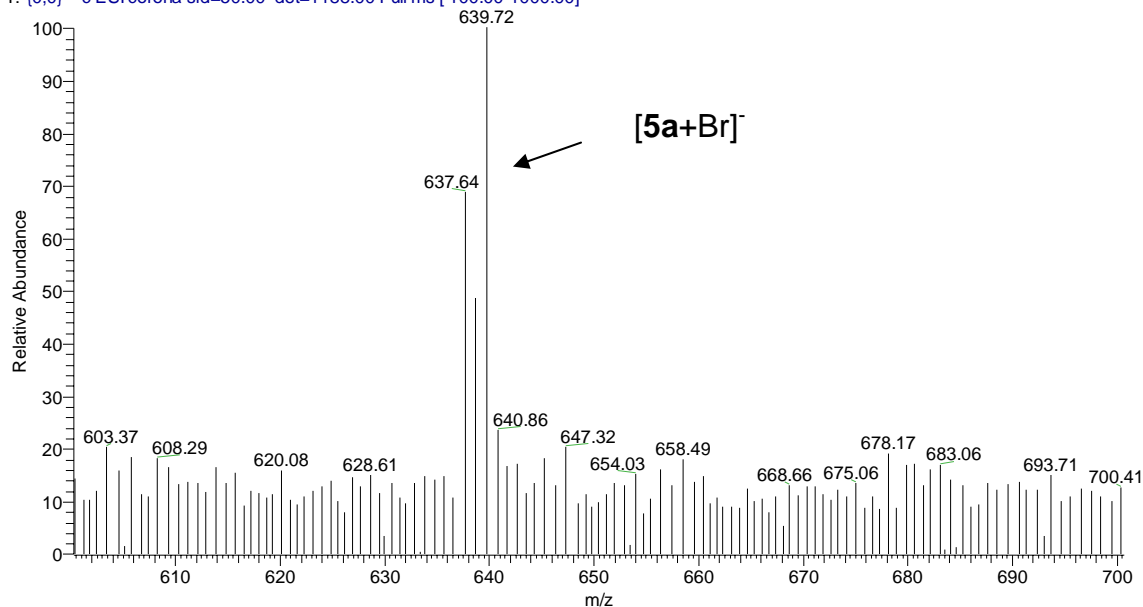

**Figure S28** ESI-MS spectrum of **5a** and bromide.

sx-no3-4 #10-18 RT: 0.16-0.29 AV: 9 NL: 5.26E3  
T: {0,0} - c ESI corona sid=30.00 det=1188.00 Full ms [ 100.00-1000.00]

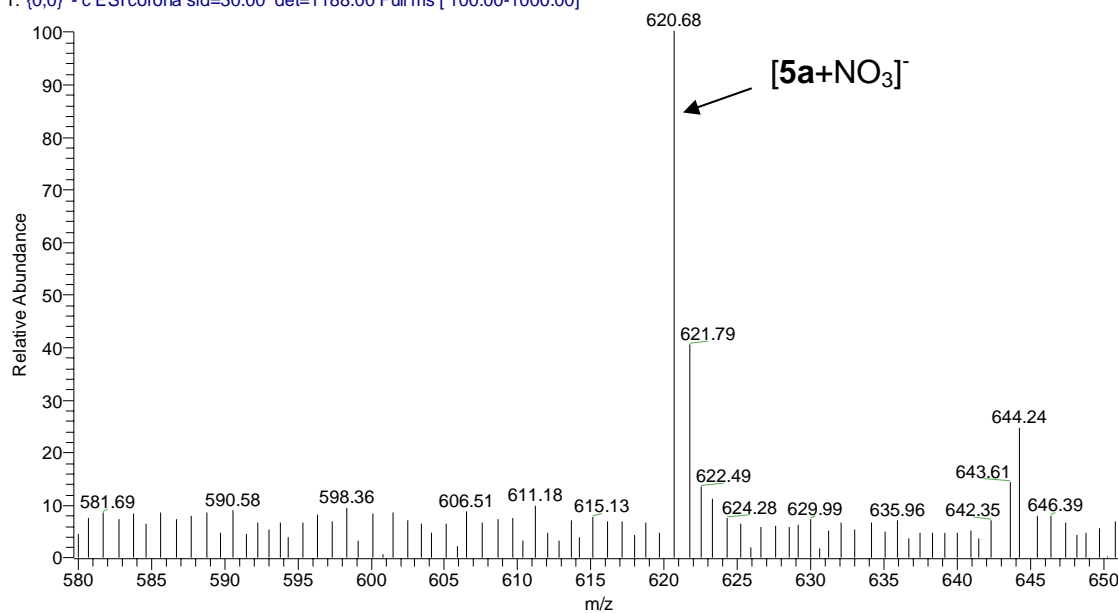

**Figure S29** ESI-MS spectrum of **5a** and nitrate.

sx-hso4-2 #8-24 RT: 0.12-0.40 AV: 17 NL: 2.65E4  
T: {0,0} - c ESI corona sid=30.00 det=1188.00 Full ms [ 100.00-1000.00]

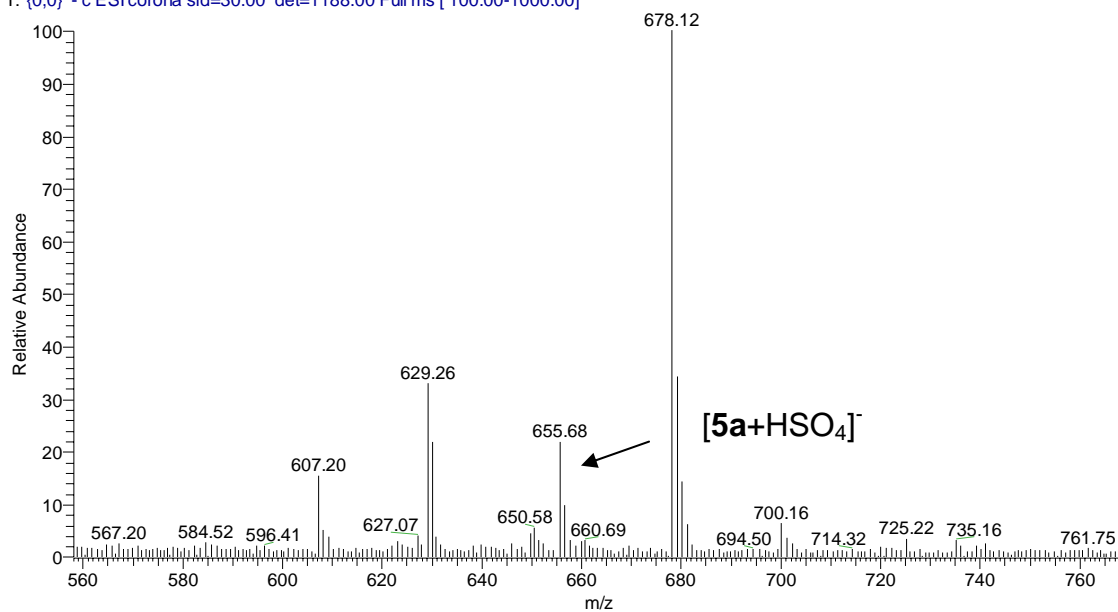

**Figure S30** ESI-MS spectrum of **5a** and sulphate.

sx-h2po4-2 #8-10 RT: 0.12-0.16 AV: 3 NL: 4.62E4  
T: {0,0} - c ESI corona sid=30.00 det=1188.00 Full ms [ 100.00-1000.00]

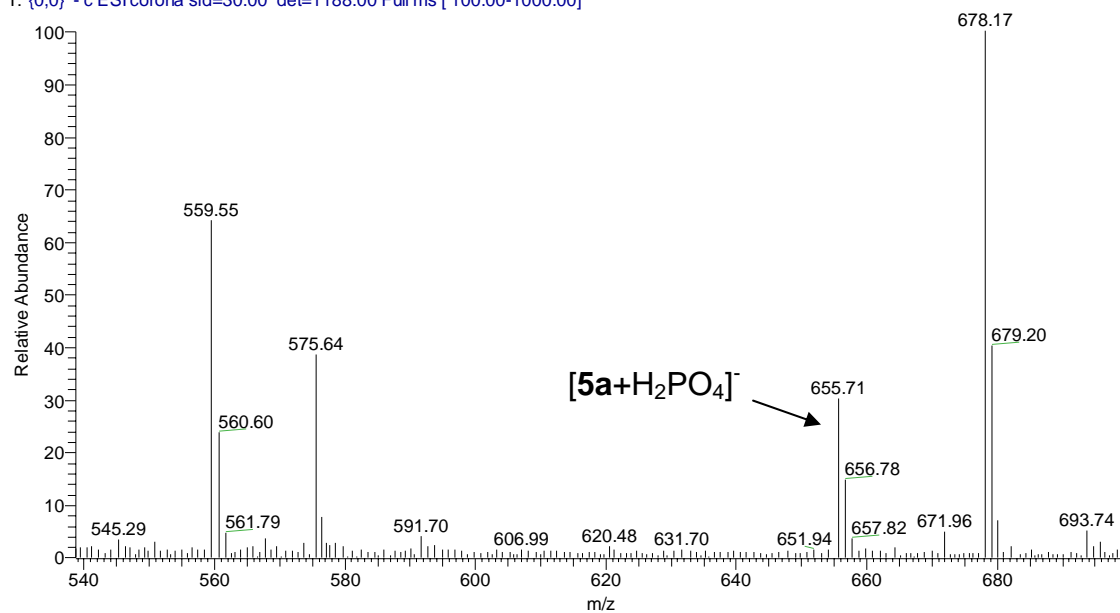

**Figure S31** ESI-MS spectrum of **5a** and phosphate.

sx-n3-2\_111128163403 #16-20 RT: 0.26-0.33 AV: 5 NL: 2.28E4  
T: {0,0} - c ESI corona sid=30.00 det=1188.00 Full ms [ 100.00-1000.00]

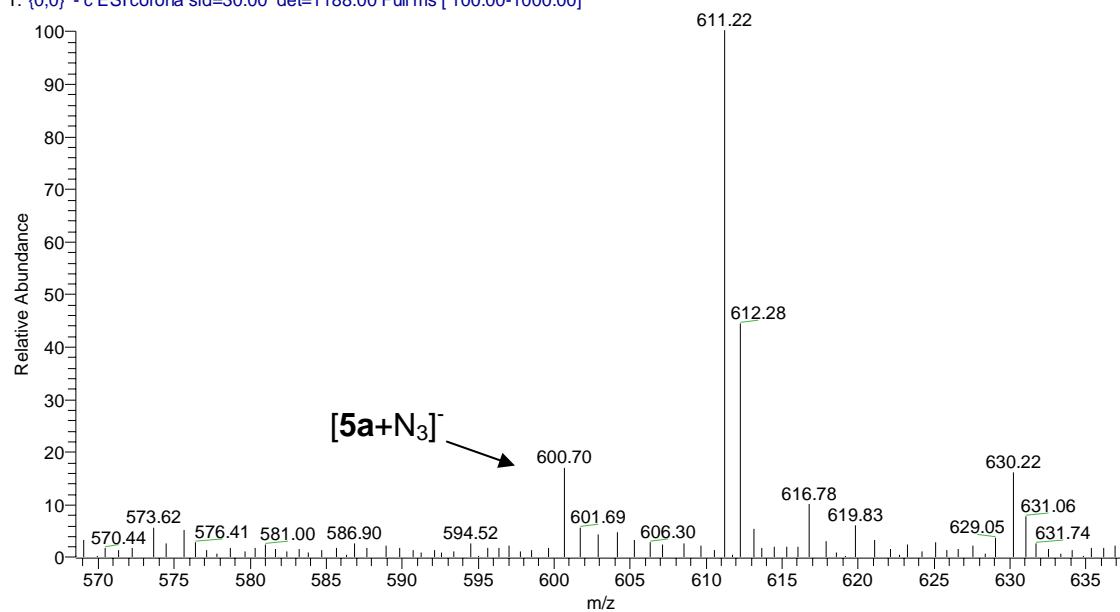

**Figure S32** ESI-MS spectrum of **5a** and azide.

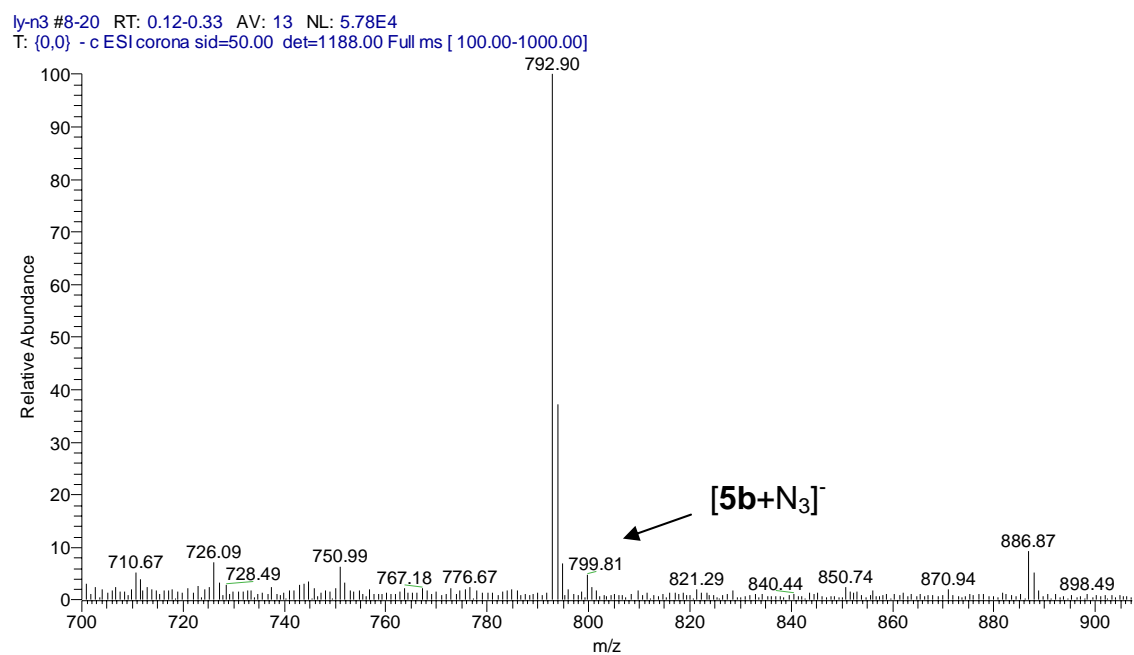

**Figure S33** ESI-MS spectrum of **5b** and azide.



## 7. $^1\text{H}$ and $^{13}\text{C}$ NMR spectra of products

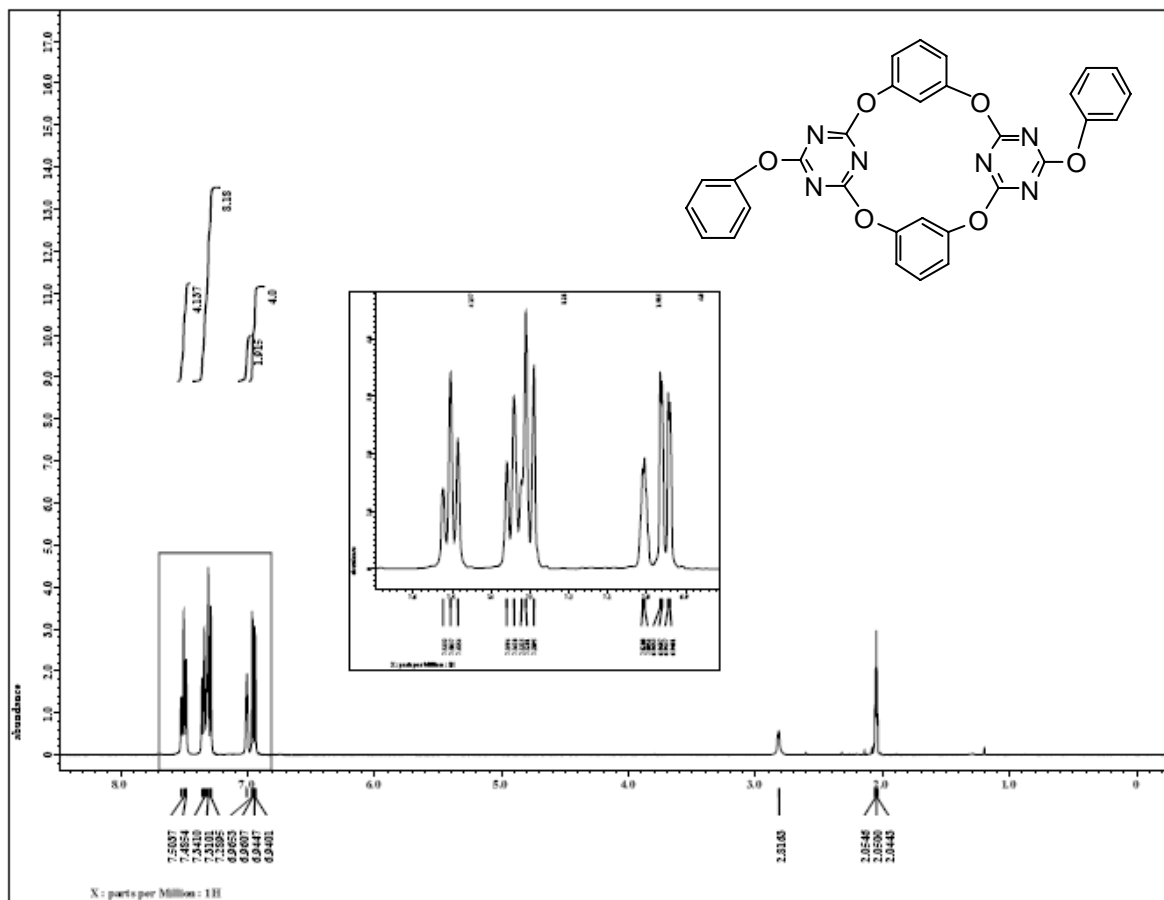

Figure S34  $^1\text{H}$  NMR of 5a.

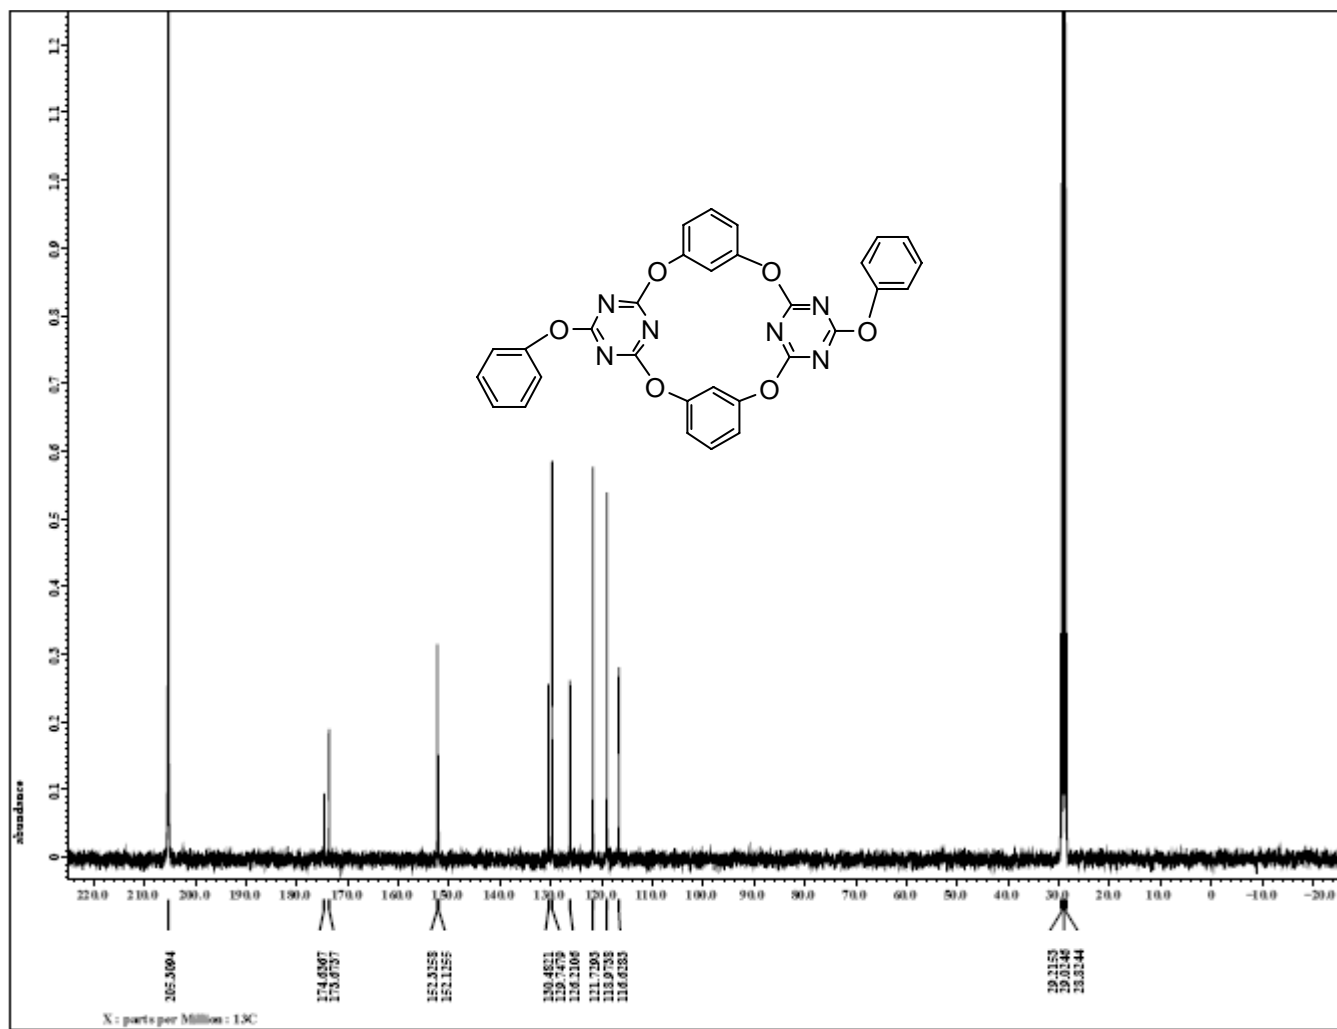

Figure S35  $^{13}\text{C}$  NMR of **5a**.

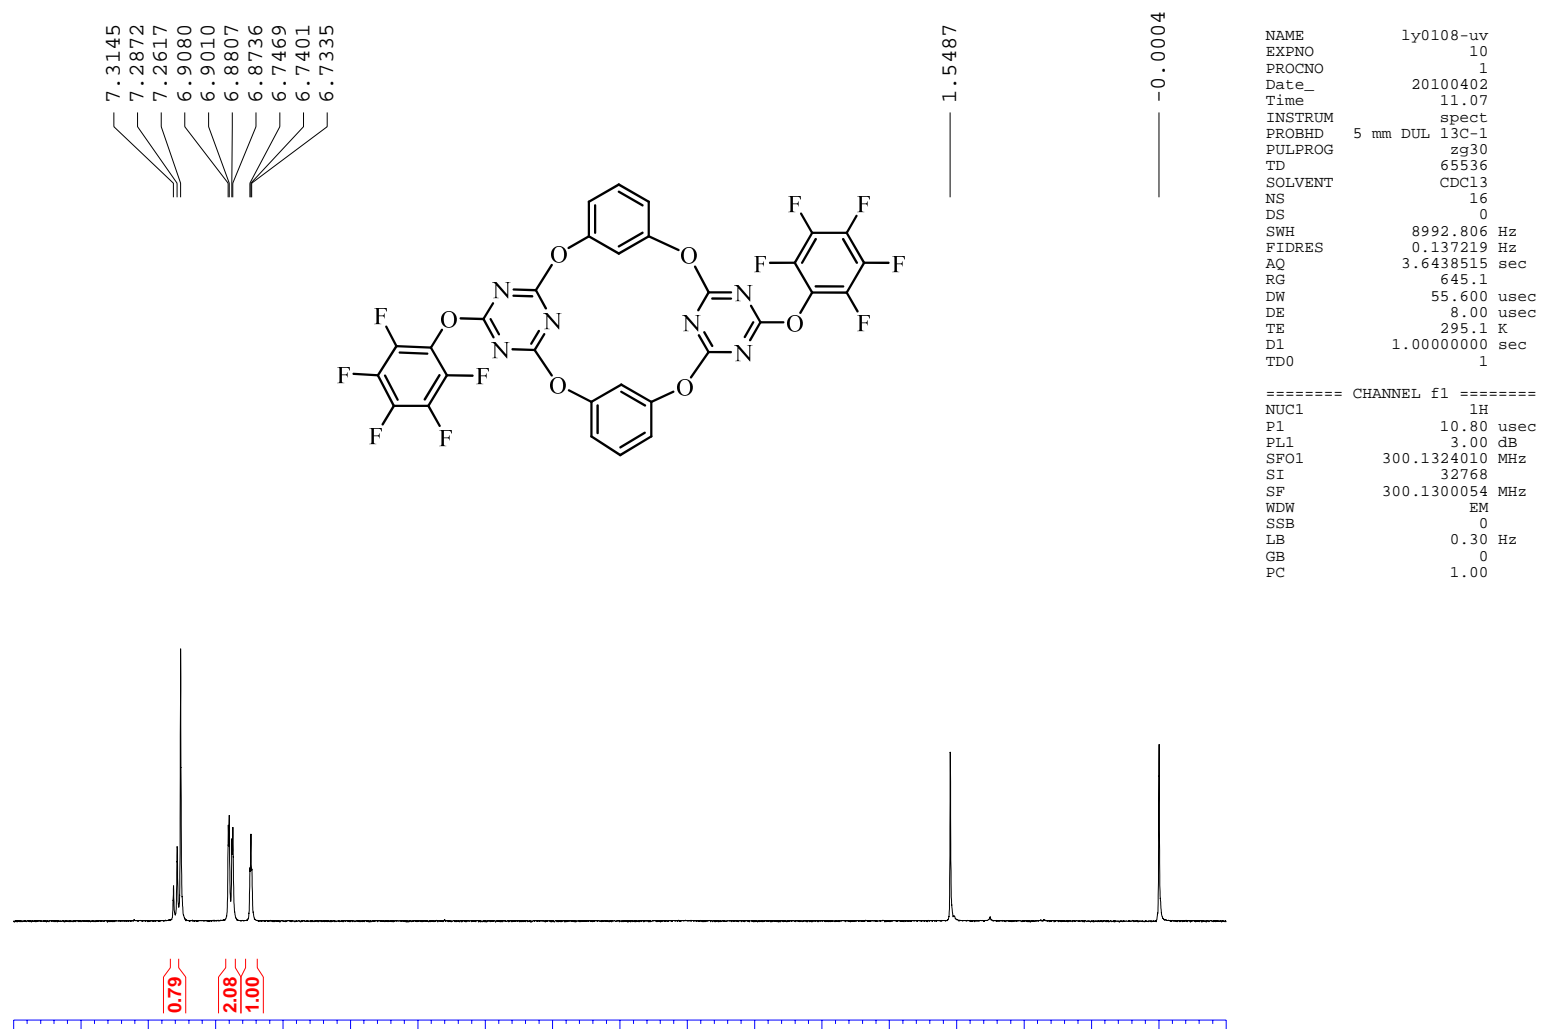

Figure S36  $^1\text{H}$  NMR of **5b**.

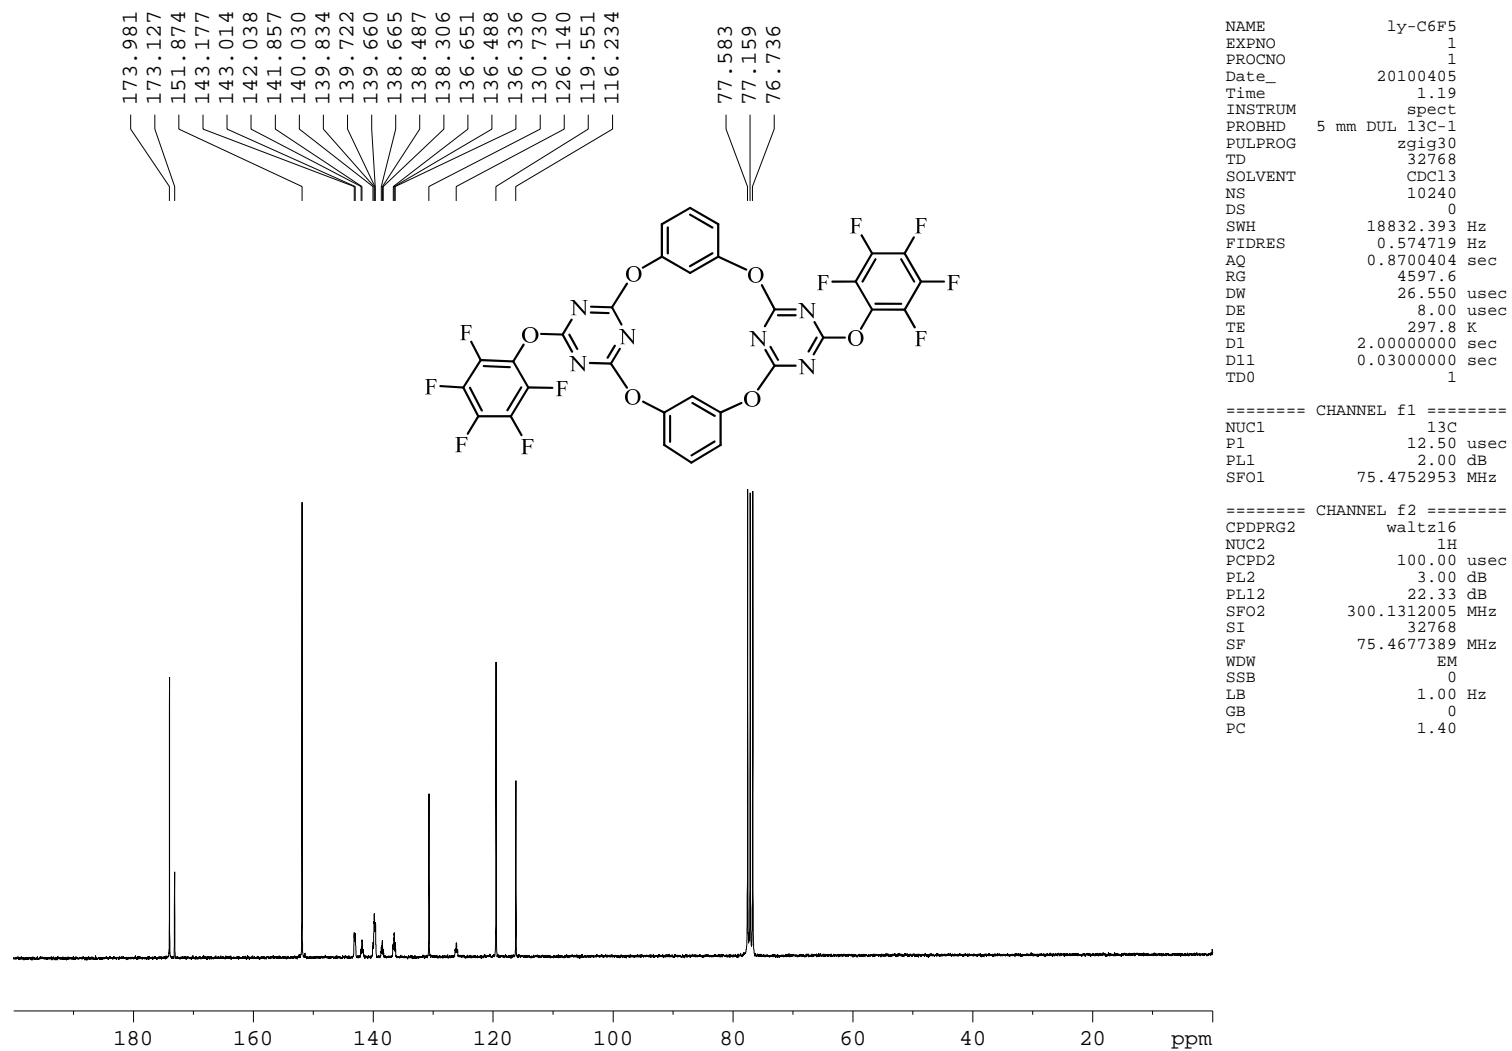

Figure S37 <sup>13</sup>C NMR of **5b**.

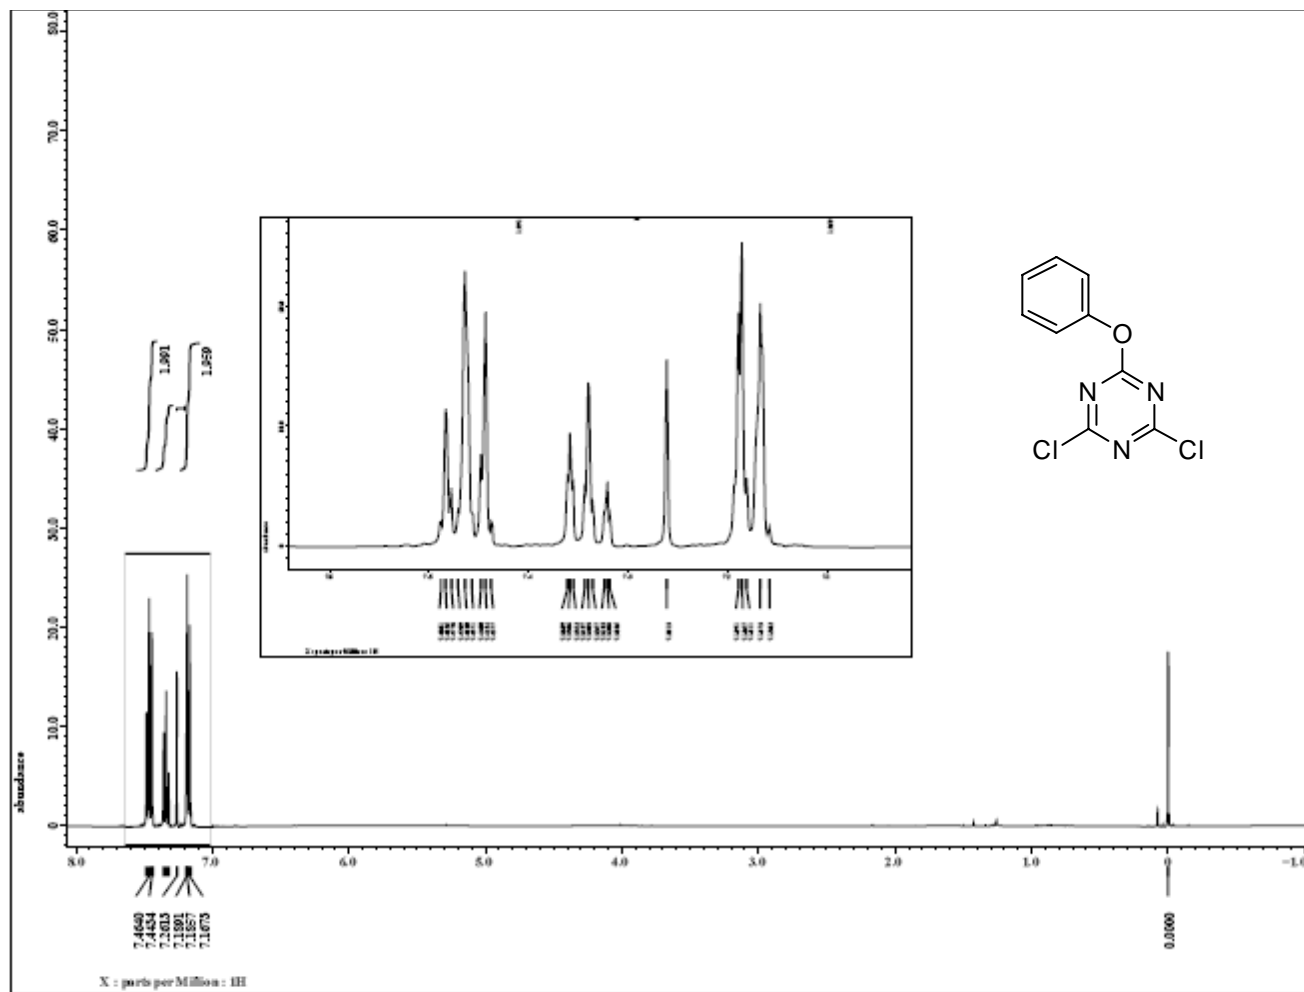

Figure S38  $^1\text{H}$  NMR of **4**.

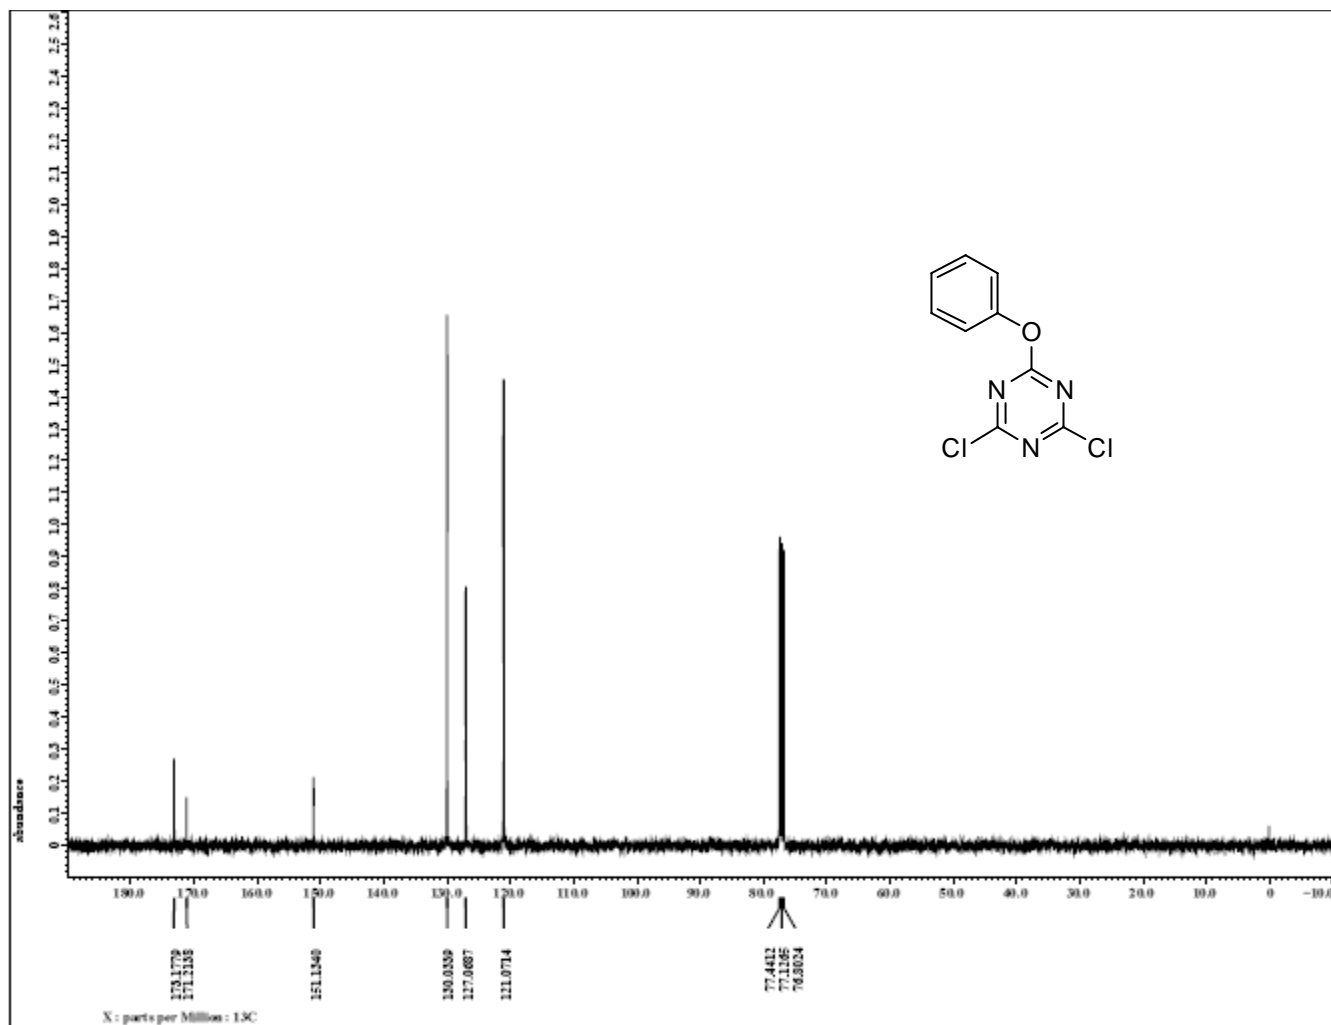

Figure S39  $^{13}\text{C}$  NMR of 4.
